# Supplementary material for: Cortical plasticity is associated with blood–brain barrier modulation
Source: eLife. 2024 Jul 18;12:RP89611. doi: 10.7554/eLife.89611 (PMC11257677; doi:10.7554/eLife.89611)
Supplement: Figure 1—figure supplement 1—source data 1. [file elife-89611-fig1-figsupp1-data1.xlsx]

## Sheet: Figure 1 - figure supplement 1
ctrl, L	PT, R
L	L
2.87775	5.61011
2.01713	4.25399
2.73065	26.583
7.81276	83.3392
2.57137	3.66312
4.42308	15.0686
29.423	138.417
