# Supplementary material for: Cortical plasticity is associated with blood–brain barrier modulation
Source: eLife. 2024 Jul 18;12:RP89611. doi: 10.7554/eLife.89611 (PMC11257677; doi:10.7554/eLife.89611)
Supplement: Figure 1—source data 1. [file elife-89611-fig1-data1.xlsx]

## Sheet: Figure 1e
time	arteriole 1
0	11.6059
0.5	11.5945
1	11.6069
1.5	11.7065
2	11.8409
2.5	11.9525
3	12.1728
3.5	12.2409
4	12.2194
4.5	12.0315
5	11.7477
5.5	11.5685
6	11.4222
6.5	11.381
7	11.4665
7.5	11.5296
8	11.5922
8.5	11.5922
9	11.5749
9.5	11.413
10	11.2357
10.5	11.0939
11	10.9349
11.5	10.7328
12	10.7186
12.5	10.8
13	11.0862
13.5	11.3536
14	11.701
14.5	11.9936
15	12.1047
15.5	12.0699
16	12.0709
16.5	11.9278
17	11.9346
17.5	12.0133
18	12.1015
18.5	12.1321
19	12.0745
19.5	11.9845
20	11.8377
20.5	11.7883
21	11.9886
21.5	12.3941
22	13.1145
22.5	13.7984
23	14.5563
23.5	15.4103
24	16.1326
24.5	16.7767
25	17.4519
25.5	18.1769
26	18.8635
26.5	19.3385
27	19.7641
27.5	20.0265
28	20.0169
28.5	19.8528
29	19.7166
29.5	19.6311
30	19.4354
30.5	19.4089
31	19.4245
31.5	19.4181
32	19.4025
32.5	19.4043
33	19.4779
33.5	19.5456
34	19.451
34.5	19.4537
35	19.4784
35.5	19.3655
36	19.0464
36.5	18.5701
37	18.2181
37.5	17.9397
38	17.7728
38.5	17.7742
39	18.0393
39.5	18.123
40	18.2386
40.5	18.2144
41	18.3022
41.5	18.4667
42	18.5481
42.5	18.7109
43	18.9138
43.5	18.9609
44	19.125
44.5	19.0848
45	19.1232
45.5	19.1465
46	19.0482
46.5	19.0286
47	18.8933
47.5	18.827
48	18.8599
48.5	18.9175
49	18.8489
49.5	18.8187
50	18.9175
50.5	18.9952
51	19.0002
51.5	19.1616
52	19.2933
52.5	19.5319
53	19.4715
53.5	19.4949
54	19.483
54.5	19.4917
55	19.4149
55.5	19.4775
56	19.3536
56.5	19.3883
57	19.3307
57.5	19.3051
58	19.2562
58.5	19.3147
59	19.3655
59.5	19.3938
60	19.3957
60.5	19.4615
61	19.5168
61.5	19.5154
62	19.4981
62.5	19.4245
63	19.408
63.5	19.2859
64	19.2133
64.5	19.1502
65	19.232
65.5	19.0912
66	19.0048
66.5	19.0834
67	19.1579
67.5	19.2302
68	19.3545
68.5	19.4569
69	19.5739
69.5	19.5072
70	19.429
70.5	19.3038
71	19.0117
71.5	18.779
72	18.6766
72.5	18.5061
73	18.3895
73.5	18.2953
74	18.1655
74.5	17.9392
75	17.8176
75.5	17.7307
76	17.6942
76.5	17.6425
77	17.5762
77.5	17.4976
78	17.4491
78.5	17.4066
79	17.3911
79.5	17.3129
80	17.1899
80.5	17.0299
81	16.7506
81.5	16.4942
82	16.2459
82.5	16.005
83	15.6462
83.5	15.4341
84	15.2233
84.5	15.0775
85	14.8402
85.5	14.6725
86	14.4754
86.5	14.2802
87	14.064
87.5	13.9323
88	13.8688
88.5	13.8304
89	13.707
89.5	13.6393
90	13.5593
90.5	13.5378
91	13.4606
91.5	13.3824
92	13.2759
92.5	13.1826
93	13.0478
93.5	12.9929
94	12.8457
94.5	12.8393
95	12.8393
95.5	12.8562
96	12.6834
96.5	12.7063
97	12.6885
97.5	12.7223
98	12.6354
98.5	12.6473
99	12.6373
99.5	12.5874

## Sheet: Figure 1g
Control	+ 30' Stim
0.99525	1.05772
1.1277	1.23774
1.07351	1.39425
0.74831	1.11342
0.93236	1.05731
0.638913	0.816427
0.748647	1.35625
0.940554	0.992222
0.807924	0.827241
1.00763	1.21083
1.09031	1.12706
1.05591	1.25902
0.804685	1.3111

## Sheet: Figure 1j
Ipsi				Contra
3.471	3.632	4.631	3.005	27.803	19.984	28.642	15.489
3.981	2.31	1.65	1.686	6.446	3.828	4.024	9.324
6.051	8.669	2.406	3.981	19.707	28.587	20.921	27.867
2.581	0.739	0.212	0.981	10.617	12.042	3.619	5.447

## Sheet: Figure 1k
ipsi		contra
1.244	0.368	1.804	0.99
0.035	0.377	4.556	1.957
1.098	3.5	5.191	6.133
1.256	1.027	8.643	1.846
2.471	2.319	3.98	3.164

## Sheet: Figure 1l
sham	0.5	4	24
-42.4342	32.6177	-3.89692	14.7996
-8.37297	150.294	-4.3452	74.2943
-17.5953	38.0276	38.9666	-14.8078
2.61127	38.4246	17.2769	8.75397
14.4788	-23.3798	33.6964	-1.7962
-37.7947	22.1068	-25.4627	60.2862
-36.8612	-18.547	39.5912	-2.07124
	45.9111	36.2236	-22.8732
