# Supplementary material for: Cortical plasticity is associated with blood–brain barrier modulation
Source: eLife. 2024 Jul 18;12:RP89611. doi: 10.7554/eLife.89611 (PMC11257677; doi:10.7554/eLife.89611)
Supplement: Figure 2—source data 1. [file elife-89611-fig2-data1.xlsx]

## Sheet: Figure 2b
	0, BL	30', - stim	60', - stim
0	7.42778	7.51389	8.58333
1	7.32222	7.50833	8.53889
2	7.21944	7.48333	8.49444
3	7.14167	7.43333	8.44722
4	7.1	7.41111	8.38056
5	7.09444	7.35	8.31667
6	7.11389	7.30833	8.225
7	7.13333	7.25833	8.16667
8	7.24722	7.19167	8.08611
9	7.4	7.16667	8.04722
10	7.53333	7.11667	8.03611
11	7.7	7.10278	8.01667
12	7.81667	7.11667	8.01111
13	7.91111	7.12778	8.01667
14	7.95278	7.16944	8.05833
15	7.91389	7.19722	8.08889
16	7.75833	7.22222	8.12222
17	7.45	7.22778	8.13611
18	6.90556	7.19167	8.08611
19	6.23611	7.06944	7.96389
20	5.29444	6.85	7.73333
21	4.15556	6.59444	7.41389
22	2.70278	6.18056	6.95
23	1.02778	5.56944	6.29167
24	-0.927778	4.825	5.48333
25	-3.07778	3.875	4.40833
26	-5.41389	2.76667	3.14444
27	-7.98611	1.38889	1.71944
28	-10.7028	-0.136111	0.00555556
29	-13.4389	-1.90278	-1.86944
30	-16.2639	-3.79444	-3.91944
31	-19.0556	-5.88889	-6.175
32	-21.775	-8.125	-8.56944
33	-24.3778	-10.4917	-11.0167
34	-26.7611	-12.8611	-13.5333
35	-28.9528	-15.2889	-16.1083
36	-30.8639	-17.6806	-18.6111
37	-32.4694	-19.9667	-21.0389
38	-33.725	-22.1583	-23.3139
39	-34.6389	-24.2194	-25.4417
40	-35.2222	-26.0444	-27.3833
41	-35.3944	-27.6472	-29.0361
42	-35.2278	-28.9694	-30.4639
43	-34.7722	-30	-31.5556
44	-33.9972	-30.7472	-32.3972
45	-32.975	-31.1806	-32.8917
46	-31.7056	-31.2806	-33.1278
47	-30.2556	-31.1194	-33.0222
48	-28.6528	-30.6444	-32.6806
49	-26.9417	-29.8833	-32.0917
50	-25.1389	-28.9556	-31.2833
51	-23.3444	-27.7778	-30.2639
52	-21.55	-26.4639	-29.1
53	-19.7722	-24.9861	-27.775
54	-18.0361	-23.4333	-26.4056
55	-16.3139	-21.7778	-24.9417
56	-14.7333	-20.1556	-23.4444
57	-13.2444	-18.5361	-21.9306
58	-11.825	-16.8889	-20.4028
59	-10.4333	-15.2972	-18.95
60	-9.24444	-13.8028	-17.5028
61	-8.02778	-12.3639	-16.0806
62	-6.93056	-10.9667	-14.7111
63	-5.91667	-9.73611	-13.4056
64	-4.94167	-8.49167	-12.1361
65	-4.03611	-7.41944	-10.9556
66	-3.16111	-6.42778	-9.76389
67	-2.31944	-5.44167	-8.70278
68	-1.57778	-4.55833	-7.63056
69	-0.802778	-3.78889	-6.60556
70	-0.075	-3.04167	-5.66111
71	0.597222	-2.35556	-4.71389
72	1.19444	-1.725	-3.80556
73	1.80833	-1.15833	-2.96667
74	2.35278	-0.555556	-2.14444
75	2.90556	-0.0916667	-1.36111
76	3.40556	0.402778	-0.686111
77	3.80278	0.858333	-0.025
78	4.20833	1.275	0.583333
79	4.58056	1.65	1.13889
80	4.91667	2	1.65556
81	5.21111	2.30278	2.11389
82	5.475	2.62778	2.51389
83	5.71944	2.89444	2.91667
84	5.98333	3.11667	3.24444
85	6.22778	3.38333	3.56389
86	6.42778	3.6	3.86667
87	6.65833	3.76944	4.14167
88	6.85833	3.99444	4.35833
89	7.04167	4.18611	4.65
90	7.24444	4.36389	4.85
91	7.40278	4.54167	5.08333
92	7.54444	4.75	5.30833
93	7.70278	4.91667	5.575
94	7.85	5.12222	5.78056
95	7.98889	5.29444	6
96	8.06667	5.48611	6.22778
97	8.14444	5.65278	6.41111
98	8.20278	5.82778	6.63611
99	8.25	5.95278	6.81667
100	8.28056	6.10278	6.95833
101	8.28611	6.23889	7.14444
102	8.27778	6.34722	7.29444
103	8.29444	6.43611	7.41944
104	8.26944	6.54444	7.51111
105	8.26389	6.61111	7.58333
106	8.24167	6.66944	7.65556
107	8.23056	6.71389	7.72778
108	8.22778	6.75833	7.78056
109	8.24167	6.78333	7.82778
110	8.25	6.81944	7.85833
111	8.25278	6.84167	7.87222
112	8.26389	6.86389	7.91944
113	8.29167	6.90556	7.96944
114	8.31111	6.96389	8.01667
115	8.31944	6.99722	8.06944
116	8.33611	7.06389	8.125
117	8.34444	7.11944	8.20556
118	8.35278	7.17222	8.26944
119	8.33333	7.20833	8.33611
120	8.31389	7.25556	8.39167
121	8.28889	7.30833	8.425
122	8.26111	7.36111	8.48611
123	8.21111	7.39722	8.52778
124	8.13056	7.44722	8.525
125	8.05833	7.475	8.55
126	8.01389	7.48333	8.55556
127	7.97778	7.48056	8.55
128	7.95833	7.46667	8.55833
129	7.93611	7.45556	8.54722
130	7.90556	7.44444	8.54722
131	7.89444	7.44167	8.53333
132	7.90278	7.41944	8.53333
133	7.89722	7.40278	8.53056
134	7.91389	7.40556	8.525
135	7.92778	7.40833	8.52778
136	7.92778	7.41667	8.52222
137	7.93889	7.43333	8.53611
138	7.96667	7.45278	8.54444
139	7.97778	7.48889	8.56111
140	7.96667	7.52222	8.58611
141	7.94444	7.53889	8.63056
142	7.94167	7.53889	8.65278
143	7.9	7.58056	8.65833
144	7.85833	7.60556	8.68333
145	7.78889	7.61389	8.69167
146	7.73333	7.61667	8.69444
147	7.68056	7.60278	8.68333
148	7.62778	7.58333	8.65833
149	7.58333	7.53611	8.63889
150	7.55278	7.50278	8.61389
151	7.53056	7.45	8.56111
152	7.53333	7.41667	8.51944
153	7.53333	7.38889	8.48333
154	7.56667	7.34722	8.46111
155	7.58611	7.31111	8.42778
156	7.60833	7.30278	8.425
157	7.65833	7.29444	8.41944
158	7.69444	7.30278	8.425
159	7.71389	7.32222	8.44444
160	7.73611	7.36389	8.46389
161	7.74167	7.38333	8.49722
162	7.725	7.40556	8.53333
163	7.69167	7.42222	8.56944
164	7.63889	7.46111	8.57778
165	7.58056	7.48056	8.59722
166	7.50556	7.49722	8.59167
167	7.38611	7.51389	8.58611

## Sheet: Figure 2c
	bl	stim
0	-1.55278	-1.00556
1	-1.66667	-1.325
2	-1.63333	-1.46667
3	-1.50833	-1.45556
4	-1.20556	-1.25833
5	-0.819444	-0.869444
6	-0.291667	-0.3
7	0.347222	0.377778
8	1.01944	1.21111
9	1.74444	2.14167
10	2.55	3.14167
11	3.31944	4.13056
12	4.00278	5.1
13	4.6	5.97778
14	5.10278	6.68333
15	5.425	7.24167
16	5.575	7.51667
17	5.48056	7.48611
18	5.15278	7.16111
19	4.60556	6.52778
20	3.82222	5.575
21	2.83056	4.22778
22	1.59167	2.66944
23	0.244444	0.802778
24	-1.29722	-1.31111
25	-2.92222	-3.54167
26	-4.62222	-5.86944
27	-6.31111	-8.25556
28	-7.92222	-10.6028
29	-9.51667	-12.8583
30	-10.9722	-14.9472
31	-12.2056	-16.8361
32	-13.2667	-18.4611
33	-14.125	-19.7667
34	-14.675	-20.7194
35	-15.0556	-21.3667
36	-15.1472	-21.6611
37	-15.0333	-21.5861
38	-14.6611	-21.2111
39	-14.0472	-20.5806
40	-13.35	-19.675
41	-12.4389	-18.5611
42	-11.4611	-17.2917
43	-10.4389	-15.9306
44	-9.31944	-14.5056
45	-8.25556	-13.0556
46	-7.175	-11.625
47	-6.13889	-10.2417
48	-5.21944	-8.99722
49	-4.34722	-7.82222
50	-3.56667	-6.77222
51	-2.88333	-5.85556
52	-2.28333	-5.05556
53	-1.80556	-4.39167
54	-1.38889	-3.84722
55	-1.05	-3.36111
56	-0.788889	-2.95833
57	-0.555556	-2.63611
58	-0.380556	-2.35278
59	-0.166667	-2.09444
60	-0.0222222	-1.83889
61	0.119444	-1.625
62	0.286111	-1.35278
63	0.427778	-1.1
64	0.594444	-0.827778
65	0.777778	-0.561111
66	0.95	-0.277778
67	1.18889	0.0111111
68	1.34167	0.3
69	1.525	0.594444
70	1.71389	0.827778
71	1.89167	1.07778
72	2.04722	1.36667
73	2.15556	1.56389
74	2.275	1.74722
75	2.40556	1.91389
76	2.51389	2.08889
77	2.59167	2.21389
78	2.65278	2.35278
79	2.71111	2.475
80	2.78333	2.58611
81	2.78056	2.69167
82	2.81944	2.83333
83	2.85556	2.94444
84	2.84722	3.04444
85	2.88889	3.16667
86	2.91389	3.28611
87	2.92778	3.39167
88	2.93889	3.52778
89	2.96111	3.65278
90	2.97778	3.75278
91	2.96944	3.81944
92	2.975	3.91389
93	2.93611	3.99167
94	2.94722	4.03333
95	2.96667	4.06944
96	2.91389	4.09167
97	2.89722	4.10278
98	2.85833	4.10833
99	2.85556	4.11667
100	2.81667	4.125
101	2.78056	4.13889
102	2.775	4.17222
103	2.74167	4.18889
104	2.71389	4.21389
105	2.7	4.25833
106	2.71389	4.27778
107	2.71389	4.30833
108	2.71667	4.34722
109	2.68611	4.38611
110	2.69444	4.425
111	2.67222	4.44167
112	2.65556	4.45556
113	2.61667	4.45833
114	2.61111	4.44444
115	2.57222	4.44167
116	2.54722	4.41667
117	2.52222	4.375
118	2.47222	4.36389
119	2.41111	4.30556
120	2.37778	4.25833
121	2.33611	4.23333
122	2.36667	4.225
123	2.31389	4.21389
124	2.3	4.21389
125	2.27222	4.24722
126	2.26667	4.24444
127	2.29167	4.275
128	2.29722	4.33611
129	2.28889	4.375
130	2.3	4.40556
131	2.31111	4.46667
132	2.24444	4.46944
133	2.24167	4.475
134	2.23056	4.45833
135	2.20556	4.425
136	2.17778	4.38056
137	2.12222	4.36111
138	2.09722	4.26944
139	2.04722	4.2
140	2.02222	4.11389
141	1.99722	4.03333
142	2	4.00556
143	1.99722	3.99722
144	2.04722	3.98056
145	2.10556	3.97778
146	2.13889	3.99722
147	2.22222	4.10278
148	2.28611	4.21667
149	2.36944	4.32778
150	2.4	4.43056
151	2.475	4.48611
152	2.46667	4.57222
153	2.425	4.61389
154	2.38056	4.59167
155	2.23056	4.5
156	2.07778	4.30556
157	1.82222	4.05556
158	1.52778	3.71944
159	1.18056	3.26667
160	0.788889	2.77222
161	0.394444	2.19722
162	-0.0555556	1.6
163	-0.477778	0.969444
164	-0.833333	0.383333
165	-1.18056	-0.244444
166	-1.41389	-0.708333
167	-1.60833	-1.11667

## Sheet: Figure 2d
	0', BL	60', + stim	90', + stim	120', + stim
0	6.10771	8.8851	10.5555	11.3534
1	6.17828	9.04735	10.7216	11.4979
2	6.24591	9.20892	10.8852	11.6405
3	6.3053	9.36361	11.0409	11.7767
4	6.35144	9.50503	11.1832	11.901
5	6.37987	9.62757	11.3076	12.0093
6	6.38745	9.72657	11.4105	12.0979
7	6.37244	9.79902	11.4898	12.1644
8	6.33496	9.84404	11.5454	12.2087
9	6.27708	9.86284	11.579	12.2321
10	6.20281	9.85927	11.5947	12.238
11	6.11809	9.83919	11.5981	12.2316
12	6.03009	9.81075	11.5968	12.2195
13	5.94728	9.78349	11.5995	12.2099
14	5.87818	9.76766	11.6152	12.2115
15	5.83141	9.77388	11.6533	12.2329
16	5.81442	9.81125	11.7211	12.2817
17	5.83247	9.88786	11.8251	12.3642
18	5.88871	10.0082	11.9683	12.484
19	5.98228	10.1734	12.1503	12.6418
20	6.10947	10.3802	12.367	12.8344
21	6.26213	10.6196	12.6084	13.0537
22	6.42762	10.8786	12.8613	13.2884
23	6.59007	11.1377	13.1066	13.5213
24	6.72881	11.3735	13.3207	13.7317
25	6.82172	11.558	13.4773	13.8949
26	6.84404	11.6591	13.5453	13.9824
27	6.76995	11.6449	13.4938	13.9655
28	6.57484	11.4809	13.2903	13.8126
29	6.23446	11.1353	12.9034	13.4941
30	5.72925	10.5788	12.3055	12.9816
31	5.04316	9.78591	11.471	12.2494
32	4.16565	8.73939	10.3826	11.279
33	3.09331	7.42779	9.02789	10.055
34	1.82873	5.84987	7.40308	8.5708
35	0.383306	4.0133	5.51386	6.82665
36	-1.22484	1.93522	3.37321	4.83091
37	-2.97034	-0.35612	1.00533	2.60215
38	-4.82085	-2.82472	-1.55883	0.164313
39	-6.73945	-5.42518	-4.27963	-2.44921
40	-8.68407	-8.10603	-7.11035	-5.19961
41	-10.6109	-10.811	-10.0005	-8.0426
42	-12.475	-13.48	-12.8943	-10.9285
43	-14.232	-16.0534	-15.7363	-13.8079
44	-15.8408	-18.4723	-18.4705	-16.6291
45	-17.2637	-20.6822	-21.0431	-19.3425
46	-18.4696	-22.6346	-23.4055	-21.9014
47	-19.4342	-24.288	-25.514	-24.2623
48	-20.1406	-25.6115	-27.3335	-26.39
49	-20.5808	-26.5837	-28.8366	-28.2538
50	-20.7548	-27.1947	-30.0051	-29.8321
51	-20.6715	-27.4457	-30.831	-31.1108
52	-20.3473	-27.3483	-31.3148	-32.0832
53	-19.8054	-26.9249	-31.4672	-32.7524
54	-19.0744	-26.2064	-31.3061	-33.1268
55	-18.1872	-25.231	-30.857	-33.2221
56	-17.1796	-24.0423	-30.1513	-33.0593
57	-16.0883	-22.6871	-29.2243	-32.6632
58	-14.9495	-21.2144	-28.1143	-32.0628
59	-13.7975	-19.672	-26.8604	-31.2871
60	-12.6633	-18.1057	-25.5016	-30.3664
61	-11.5737	-16.5568	-24.0752	-29.3296
62	-10.5503	-15.0617	-22.615	-28.2044
63	-9.60954	-13.6502	-21.1514	-27.0163
64	-8.76174	-12.3451	-19.7099	-25.7868
65	-8.01207	-11.1624	-18.3115	-24.5345
66	-7.36019	-10.11	-16.9718	-23.2739
67	-6.80118	-9.19036	-15.7017	-22.017
68	-6.3269	-8.39905	-14.5073	-20.7722
69	-5.92566	-7.72742	-13.3908	-19.545
70	-5.58485	-7.16286	-12.3517	-18.3388
71	-5.29026	-6.68973	-11.3858	-17.1549
72	-5.02793	-6.29211	-10.4887	-15.995
73	-4.78538	-5.9525	-9.6533	-14.8584
74	-4.5509	-5.65533	-8.87333	-13.746
75	-4.31596	-5.38618	-8.14285	-12.6581
76	-4.07354	-5.13269	-7.45573	-11.5955
77	-3.81937	-4.88617	-6.80814	-10.5612
78	-3.55213	-4.63945	-6.19617	-9.55712
79	-3.27195	-4.38932	-5.61793	-8.58741
80	-2.98181	-4.13448	-5.07269	-7.65599
81	-2.6853	-3.8758	-4.55979	-6.76685
82	-2.38708	-3.61653	-4.08028	-5.92509
83	-2.09254	-3.35999	-3.63441	-5.13363
84	-1.80629	-3.1108	-3.22315	-4.39627
85	-1.53311	-2.87301	-2.84703	-3.71503
86	-1.27624	-2.65009	-2.50536	-3.09062
87	-1.03787	-2.44505	-2.19754	-2.52338
88	-0.81916	-2.25895	-1.92136	-2.01072
89	-0.6194	-2.09203	-1.67422	-1.55016
90	-0.43725	-1.94285	-1.45261	-1.13738
91	-0.26989	-1.80859	-1.25194	-0.76694
92	-0.11384	-1.68589	-1.06775	-0.43355
93	0.034524	-1.57013	-0.89499	-0.13021
94	0.179452	-1.45673	-0.72892	0.148903
95	0.324469	-1.34099	-0.56516	0.409914
96	0.472882	-1.21846	-0.39954	0.658507
97	0.627193	-1.08587	-0.22923	0.898838
98	0.78868	-0.94044	-0.05201	1.13522
99	0.958084	-0.78087	0.133176	1.36985
100	1.13467	-0.607	0.326297	1.60431
101	1.31706	-0.41967	0.526801	1.83922
102	1.50307	-0.22124	0.73281	2.07369
103	1.68971	-0.01443	0.942186	2.30703
104	1.87412	0.197125	1.15231	2.53721
105	2.05301	0.409648	1.36036	2.76233
106	2.22354	0.619519	1.56406	2.98057
107	2.38338	0.823064	1.761	3.18985
108	2.53066	1.01772	1.94966	3.38928
109	2.66464	1.20142	2.12912	3.57786
110	2.78509	1.37324	2.29908	3.75561
111	2.89284	1.53333	2.46043	3.92329
112	2.98952	1.68248	2.61426	4.08192
113	3.07722	1.82281	2.76266	4.2337
114	3.15873	1.95679	2.90794	4.38068
115	3.23676	2.08753	3.05255	4.52543
116	3.31417	2.21836	3.19932	4.6706
117	3.39359	2.35218	3.35035	4.81829
118	3.47704	2.49195	3.50774	4.97079
119	3.56614	2.63971	3.67283	5.12936
120	3.6615	2.79685	3.84611	5.29481
121	3.7631	2.96393	4.02774	5.46739
122	3.87019	3.14027	4.21657	5.64624
123	3.98119	3.3247	4.41124	5.83038
124	4.09414	3.51494	4.60962	6.01776
125	4.2065	3.70828	4.80905	6.20612
126	4.31575	3.90168	5.0071	6.3932
127	4.41946	4.09175	5.20081	6.57629
128	4.51536	4.27562	5.38798	6.75342
129	4.60183	4.45052	5.56661	6.92247
130	4.67769	4.61451	5.73521	7.08209
131	4.7427	4.76645	5.89339	7.23175
132	4.79737	4.90594	6.04104	7.37129
133	4.84287	5.03383	6.17929	7.50171
134	4.88116	5.15151	6.30972	7.62419
135	4.91453	5.26137	6.43439	7.74066
136	4.94577	5.36629	6.55609	7.85361
137	4.97772	5.46937	6.67733	7.96539
138	5.01297	5.57402	6.80101	8.07873
139	5.05389	5.68308	6.92946	8.19562
140	5.1021	5.79914	7.06445	8.31793
141	5.15862	5.92403	7.20742	8.44697
142	5.22362	6.05856	7.35856	8.5831
143	5.29628	6.20282	7.51768	8.72627
144	5.37515	6.35555	7.68346	8.87513
145	5.45785	6.51484	7.85379	9.02804
146	5.5416	6.67795	8.02629	9.18272
147	5.62326	6.84146	8.19779	9.33637
148	5.69952	7.00188	8.36536	9.48635
149	5.7675	7.15548	8.52596	9.62955
150	5.82456	7.2991	8.67684	9.76369
151	5.8689	7.4302	8.81625	9.88687
152	5.89954	7.54698	8.9428	9.99786
153	5.91645	7.64891	9.05645	10.0966
154	5.9208	7.73639	9.15794	10.1834
155	5.91453	7.81121	9.24891	10.2599
156	5.90057	7.87621	9.33223	10.3287
157	5.88244	7.93499	9.41103	10.3926
158	5.86398	7.9919	9.48921	10.4554
159	5.84923	8.05137	9.57059	10.5204
160	5.84178	8.11791	9.65875	10.5912
161	5.84474	8.19546	9.75705	10.6708
162	5.8603	8.28703	9.86761	10.7617
163	5.88944	8.39451	9.99177	10.8651
164	5.93208	8.51824	10.1295	10.9809
165	5.98659	8.65718	10.2792	11.1083
166	6.05025	8.80869	10.4386	11.2449
167	6.11917	8.96864	10.6036	11.3873

## Sheet: Figure 2e
BL	+ 30' stim
1.181	3.153
15.15	21.66
15.64	23.63
7.731	8.1
7.3	28.44
20.76	27.45

## Sheet: Figure 2f
BL	+30' stim
48.55	107.2
574.2	864
624.8	877.1
299.3	345.5
286.4	1425
1011	1335

## Sheet: Figure 2h
	bl1	BL	+Alb
0	2.23243	2.07479	4.49371
1	2.16219	2.00712	4.45787
2	2.10388	1.9438	4.44717
3	2.06433	1.89176	4.46714
4	2.05016	1.85707	4.52077
5	2.06632	1.84548	4.60889
6	2.1162	1.86112	4.72935
7	2.20021	1.9057	4.87536
8	2.31561	1.97904	5.03777
9	2.45711	2.07716	5.20276
10	2.6156	2.19386	5.35399
11	2.7793	2.31956	5.47214
12	2.93261	2.44142	5.5345
13	3.05735	2.54471	5.51837
14	3.13417	2.61162	5.39941
15	3.14233	2.62415	5.15508
16	3.06185	2.56348	4.76439
17	2.87283	2.41123	4.20886
18	2.55768	2.15115	3.47523
19	2.10256	1.76869	2.55439
20	1.4976	1.25393	1.44411
21	0.73849	0.600803	0.148059
22	-0.174228	-0.191601	-1.32317
23	-1.23365	-1.11849	-2.95162
24	-2.42652	-2.16989	-4.71354
25	-3.73364	-3.32942	-6.57866
26	-5.13023	-4.57599	-8.51255
27	-6.58726	-5.8837	-10.4762
28	-8.07143	-7.22289	-12.428
29	-9.5469	-8.56135	-14.3257
30	-10.9767	-9.86484	-16.127
31	-12.3243	-11.0996	-17.7927
32	-13.555	-12.2328	-19.286
33	-14.6366	-13.2343	-20.5746
34	-15.541	-14.0775	-21.633
35	-16.246	-14.7405	-22.4415
36	-16.7359	-15.2074	-22.989
37	-17.0017	-15.4685	-23.2705
38	-17.0406	-15.5206	-23.2889
39	-16.8571	-15.367	-23.0545
40	-16.4625	-15.017	-22.5836
41	-15.8743	-14.4863	-21.8987
42	-15.1154	-13.7952	-21.0261
43	-14.2114	-12.9683	-19.9958
44	-13.1916	-12.0323	-18.8396
45	-12.0866	-11.016	-17.5899
46	-10.9278	-9.94881	-16.2791
47	-9.74536	-8.85928	-14.937
48	-8.56687	-7.77424	-13.5922
49	-7.41734	-6.71708	-12.2686
50	-6.31779	-5.70816	-10.9867
51	-5.28564	-4.76405	-9.7631
52	-4.33313	-3.89654	-8.60882
53	-3.4678	-3.11352	-7.53255
54	-2.6934	-2.41771	-6.53746
55	-2.00913	-1.80875	-5.62399
56	-1.4115	-1.28282	-4.78949
57	-0.893396	-0.833047	-4.02846
58	-0.446024	-0.451038	-3.33552
59	-0.0598196	-0.126264	-2.70275
60	0.275913	0.151354	-2.12287
61	0.571	0.392155	-1.58838
62	0.835463	0.605832	-1.09232
63	1.07738	0.800518	-0.629806
64	1.30302	0.983431	-0.195928
65	1.51739	1.15916	0.212215
66	1.72327	1.33104	0.596875
67	1.92267	1.5006	0.958989
68	2.11533	1.66778	1.29837
69	2.29981	1.83162	1.61486
70	2.47405	1.98964	1.90752
71	2.63545	2.13932	2.17587
72	2.78195	2.27787	2.41912
73	2.91111	2.4028	2.63719
74	3.02113	2.5122	2.83077
75	3.11098	2.60456	3.00085
76	3.18054	2.67948	3.14939
77	3.231	2.73735	3.27837
78	3.26393	2.77962	3.39074
79	3.28175	2.80849	3.48973
80	3.28738	2.82654	3.57838
81	3.28413	2.83685	3.65989
82	3.27565	2.84259	3.7367
83	3.26502	2.84693	3.81129
84	3.25511	2.85271	3.88549
85	3.24812	2.86204	3.96022
86	3.24562	2.87643	4.0359
87	3.24852	2.89658	4.11196
88	3.25662	2.92254	4.18765
89	3.2692	2.95359	4.26167
90	3.28486	2.9882	4.33231
91	3.30174	3.02444	4.39779
92	3.31781	3.06002	4.4562
93	3.33074	3.09272	4.50622
94	3.33853	3.12039	4.54673
95	3.33949	3.14097	4.57711
96	3.33238	3.15305	4.59729
97	3.31662	3.15572	4.60762
98	3.29208	3.14889	4.60937
99	3.25953	3.13304	4.60403
100	3.22024	3.10916	4.59352
101	3.17596	3.07894	4.57995
102	3.12882	3.04437	4.56536
103	3.08098	3.00782	4.552
104	3.03484	2.9716	4.54162
105	2.99248	2.93776	4.5356
106	2.95563	2.90826	4.53486
107	2.92551	2.88448	4.53967
108	2.90271	2.8673	4.54992
109	2.88735	2.85692	4.56481
110	2.87881	2.8528	4.58312
111	2.87589	2.85402	4.6033
112	2.87697	2.85906	4.62354
113	2.88003	2.86601	4.64205
114	2.88309	2.87276	4.65711
115	2.88403	2.8771	4.66727
116	2.88093	2.87719	4.67152
117	2.87232	2.8714	4.66924
118	2.85721	2.85852	4.66038
119	2.83529	2.83789	4.64544
120	2.80677	2.80953	4.62545
121	2.77243	2.77426	4.6019
122	2.73372	2.73333	4.5765
123	2.69255	2.68844	4.55114
124	2.65118	2.64166	4.52772
125	2.61186	2.59523	4.50802
126	2.57675	2.55164	4.4935
127	2.54782	2.51292	4.48514
128	2.52664	2.48073	4.48337
129	2.51428	2.45623	4.48811
130	2.51102	2.43992	4.49867
131	2.51638	2.43181	4.5138
132	2.52928	2.43096	4.53189
133	2.54806	2.43585	4.55098
134	2.57058	2.4445	4.56909
135	2.5943	2.45438	4.58424
136	2.61653	2.46306	4.59465
137	2.63474	2.46784	4.59902
138	2.64672	2.46644	4.59662
139	2.65074	2.45711	4.58745
140	2.64571	2.43852	4.57211
141	2.63131	2.41032	4.55182
142	2.60805	2.37278	4.52844
143	2.57725	2.32716	4.50437
144	2.54092	2.27558	4.48234
145	2.50158	2.22062	4.46501
146	2.46217	2.16543	4.45486
147	2.42575	2.11328	4.454
148	2.39526	2.06749	4.46393
149	2.37314	2.03115	4.4854
150	2.36122	2.00662	4.51808
151	2.36055	1.99554	4.56073
152	2.37118	1.99857	4.61115
153	2.39218	2.01526	4.66623
154	2.42147	2.04415	4.7223
155	2.45617	2.08264	4.77516
156	2.4927	2.12732	4.82063
157	2.52703	2.17417	4.8548
158	2.5551	2.21875	4.87428
159	2.57293	2.25665	4.87676
160	2.57727	2.28378	4.86116
161	2.56588	2.29686	4.82794
162	2.5377	2.29378	4.77907
163	2.49322	2.27358	4.71819
164	2.43441	2.23683	4.65032
165	2.36482	2.18564	4.58181
166	2.28959	2.12373	4.51991
167	2.21488	2.05627	4.47175

## Sheet: Figure 2i
BL	+Alb
6.434	7.664
3.762	8.786
1.052	12.43
3.973	4.713
15.52	23.29

## Sheet: Figure 2j
BL	+Alb
311.4	726.3
166.5	394.1
43.73	566.5
189.9	232.3
614.7	1041

## Sheet: Figure 2k
frequency	bl	alb
0	0.0177065	0.0283832
1	0.471045	1.10553
2	1.01426	2.39504
3	0.650588	1.21198
4	0.410773	0.659663
5	0.353942	0.480962
6	0.318611	0.40302
7	0.211971	0.272428
8	0.127695	0.185579
9	0.0874277	0.154296
10	0.0819512	0.148085
11	0.0670124	0.137823
12	0.0597638	0.115684
13	0.0548531	0.0920406
14	0.0480198	0.0728355
15	0.0392605	0.0599411
16	0.0306178	0.0461644
17	0.0258407	0.038795
18	0.0221085	0.0316771
19	0.0184367	0.0261411
20	0.0222589	0.0316011
21	0.0168734	0.0231219
22	0.011177	0.0164596
23	0.0119851	0.0173811
24	0.00974385	0.0133499
25	0.00800565	0.0110549
26	0.00857376	0.0104112
27	0.00983778	0.0091453
28	0.009224	0.00827614
29	0.00873637	0.00878651
30	0.00811851	0.00763238
31	0.00578466	0.00672652
32	0.00495418	0.00596849
33	0.00440856	0.00573458
34	0.00447683	0.00535921
35	0.00516161	0.00487276
36	0.00479957	0.00483868
37	0.00593819	0.00606336
38	0.00599956	0.00489957
39	0.00544576	0.00456849
40	0.00665605	0.0049855
41	0.0121717	0.00393258
42	0.00682539	0.00392593
43	0.00420876	0.00407641
44	0.00433445	0.0039348
45	0.00536716	0.00367883
46	0.00571171	0.00392686
47	0.00389857	0.00409972
48	0.00440896	0.00486394
49	0.00766019	0.00934042
50	0.014396	0.0172779
51	0.00694038	0.00788393
52	0.00419222	0.00392265
53	0.00354933	0.00384552
54	0.00329091	0.00362222
55	0.00320249	0.00343087
56	0.00328396	0.00346803
57	0.00318816	0.00379117
58	0.00333891	0.00405244
59	0.00350097	0.00403965
60	0.00539964	0.00588352
61	0.00407729	0.00420804
62	0.00344052	0.00377318
63	0.00377798	0.00402258
64	0.00332425	0.00375403
65	0.0030847	0.00380729
66	0.00312652	0.00376084
67	0.00324239	0.00347155
68	0.00320974	0.00351072
69	0.00338802	0.00372047
70	0.00348229	0.00387941
71	0.00339678	0.00386649
72	0.00343509	0.00379978
73	0.00331024	0.00366966
74	0.0032636	0.00371978
75	0.00342712	0.00363534
76	0.00393767	0.00386832
77	0.00449662	0.00407602
78	0.00397238	0.00380406
79	0.00364529	0.00427142
80	0.00457628	0.00489692
81	0.00360471	0.00435996
82	0.00331357	0.00381526
83	0.00317518	0.00369855
84	0.00311514	0.00379157
85	0.0031361	0.00347175
86	0.00329278	0.00363233
87	0.00339294	0.00357464
88	0.0031603	0.00383056
89	0.00314643	0.00357138
90	0.00322913	0.00373898
91	0.00309566	0.00375022
92	0.00297103	0.00361358
93	0.00288774	0.00362599
94	0.00295519	0.00366012
95	0.00318548	0.00373379
96	0.00351021	0.0038764
97	0.00375379	0.00416571
98	0.00787913	0.00470211
99	0.0664134	0.136873
100	0.428856	0.754712
101	0.124358	0.157561
102	0.00538157	0.00435713
103	0.00367002	0.00382582
104	0.00305394	0.00368262
105	0.00304661	0.00374501
106	0.0030825	0.0035916
107	0.00323136	0.00358673
108	0.00327894	0.00383087
109	0.00355644	0.00433366
110	0.00397182	0.00510494
111	0.00352302	0.0042361
112	0.00306917	0.00356921
113	0.0030778	0.00347584
114	0.00298281	0.00375362
115	0.00309739	0.00372255
116	0.00323097	0.00387085
117	0.00333085	0.00386191
118	0.00320089	0.00386943
119	0.00464354	0.0062691
120	0.0428363	0.0600697
121	0.0274586	0.0384618
122	0.00361322	0.00390192
123	0.00343004	0.00383791
124	0.0030902	0.00364312
125	0.00304177	0.00350282
126	0.00312538	0.003569
127	0.00361185	0.00332909
128	0.00378925	0.0034069
129	0.00347484	0.00375208
130	0.00346212	0.00427182
131	0.00360721	0.00438557
132	0.00323378	0.00379994
133	0.00302351	0.00376681
134	0.00286114	0.00379306
135	0.00302697	0.00381968
136	0.00307562	0.00374079
137	0.00303338	0.00381766
138	0.00317148	0.00365268
139	0.00313051	0.00446629
140	0.00455164	0.00578451
141	0.00340676	0.00396309
142	0.00329728	0.00361197
143	0.00351317	0.00377132
144	0.00312272	0.00356575
145	0.00300739	0.00333437
146	0.00323752	0.00362121
147	0.00329299	0.00389207
148	0.00385031	0.00413994
149	0.00845073	0.0349513
150	0.0225604	0.171684
151	0.010722	0.0382397
152	0.00345967	0.00429473
153	0.00294416	0.0040591
154	0.00313768	0.00370129
155	0.00303246	0.00344845
156	0.00308575	0.00326338
157	0.00403232	0.00462881
158	0.00406825	0.0050353
159	0.00372964	0.00472854
160	0.0105373	0.0135502
161	0.00670682	0.00753589
162	0.00324664	0.00370798
163	0.00339086	0.0037442
164	0.00297998	0.00386599
165	0.00310453	0.00374755
166	0.00324215	0.0038475
167	0.00314923	0.00364228
168	0.00295607	0.0035533
169	0.00317738	0.00382801
170	0.00419638	0.00543957
171	0.00416755	0.00454827
172	0.00359145	0.0036451
173	0.0033087	0.00349587
174	0.00314259	0.00361736
175	0.0029769	0.00348144
176	0.00311296	0.00349131
177	0.00379835	0.00387273
178	0.00366814	0.00384043
179	0.00352438	0.00460191
180	0.0169387	0.0198988
181	0.0171569	0.0202673
182	0.00337475	0.00386449
183	0.00319548	0.0035861
184	0.00323936	0.00380528
185	0.00316274	0.0036934
186	0.00313771	0.00371756
187	0.00318952	0.00331505
188	0.00322022	0.00360268
189	0.00329518	0.00364748
190	0.00327569	0.00367217
191	0.00310984	0.00366177
192	0.00319493	0.00357286
193	0.00317247	0.00334149
194	0.00297431	0.00362929
195	0.00311815	0.00367171
196	0.00334902	0.00365417
197	0.0037215	0.00365523
198	0.00431139	0.00442673
199	0.0151728	0.0484415
200	0.162363	0.286657
201	0.0741015	0.0725743
202	0.00522583	0.00483614
203	0.00360419	0.0041985
204	0.0033144	0.0044354
205	0.00310678	0.00387686
206	0.00311862	0.00365669
207	0.00324073	0.00376412
208	0.00337493	0.00397528
209	0.003445	0.00414073
210	0.00407706	0.00488534
211	0.00404319	0.00447414
212	0.00299197	0.00385501
213	0.0028084	0.00371392
214	0.0028065	0.00386285
215	0.00277958	0.00383104
216	0.00288419	0.00380111
217	0.0037451	0.00490481
218	0.00492711	0.00610692
219	0.00365363	0.00470703
220	0.0104788	0.0163502
221	0.0100304	0.0120713
222	0.00331684	0.00372717
223	0.00307622	0.00362251
224	0.00320461	0.00351727
225	0.00328003	0.00371046
226	0.00334995	0.00362603
227	0.00382441	0.00348245
228	0.00382756	0.00362387
229	0.00374543	0.00388699
230	0.00361847	0.00411776
231	0.00339137	0.00427488
232	0.00307734	0.00397795
233	0.00307166	0.00373446
234	0.00293869	0.00390754
235	0.00285512	0.00389894
236	0.00288415	0.00366924
237	0.00305134	0.00363228
238	0.00317836	0.00387348
239	0.00319248	0.00418251
240	0.00429176	0.0049749
241	0.00442109	0.00463196
242	0.00327379	0.00353541
243	0.00333414	0.00353394
244	0.00313261	0.00400134
245	0.00324471	0.00378636
246	0.00322328	0.00371687
247	0.00311866	0.00395615
248	0.00340359	0.00398245
249	0.00660366	0.0161844
250	0.0255126	0.0729822
251	0.0160218	0.0209222
252	0.00382703	0.00427567
253	0.00307268	0.00385946
254	0.00303874	0.00387288
255	0.00321003	0.00381631
256	0.00306668	0.00390639
257	0.00319515	0.00386951
258	0.00350834	0.00388122
259	0.00329472	0.00388051
260	0.00609975	0.00793001
261	0.00674919	0.00820815
262	0.00341522	0.00411229
263	0.00340568	0.00379884
264	0.00337402	0.00416573
265	0.00306091	0.00345013
266	0.00322766	0.00361104
267	0.00295765	0.00357239
268	0.00313154	0.00377517
269	0.00302773	0.00391976
270	0.00349769	0.00479146
271	0.00431669	0.00444879
272	0.00414137	0.00383881
273	0.00342236	0.00351676
274	0.0033531	0.00356293
275	0.00321864	0.00377739
276	0.0033684	0.00388556
277	0.00367878	0.00371543
278	0.00409032	0.00416136
279	0.00418215	0.00435697
280	0.00515983	0.0066264
281	0.00573561	0.00634154
282	0.00336577	0.00383461
283	0.00316328	0.00375868
284	0.00320318	0.00382634
285	0.00315446	0.00397291
286	0.00307957	0.00372466
287	0.00323013	0.00369036
288	0.00341668	0.00366115
289	0.00331205	0.00361292
290	0.00332205	0.00363859
291	0.0030666	0.00362765
292	0.00324938	0.00367544
293	0.00341144	0.00370179
294	0.00336215	0.00375188
295	0.00318386	0.00355528
296	0.00323824	0.00345801
297	0.00358806	0.0036296
298	0.00514289	0.00429864
299	0.0080224	0.0229439
300	0.0619877	0.119284
301	0.0592708	0.0593757
302	0.00742685	0.00724123
303	0.00348452	0.00390274
304	0.00344855	0.00389971
305	0.00334497	0.00348441
306	0.00324415	0.00369653
307	0.00322185	0.00348857
308	0.00359638	0.00393963
309	0.00339118	0.0041534
310	0.00369649	0.00386835
311	0.00433625	0.00428649
312	0.00392107	0.00377539
313	0.00361356	0.00382586
314	0.00360797	0.00387943
315	0.00368194	0.00404671
316	0.00391454	0.00372694
317	0.00377398	0.00399119
318	0.00410627	0.00399199
319	0.00375779	0.00376505
320	0.00494557	0.0069238
321	0.00540277	0.0060066
322	0.00352732	0.00344056
323	0.00362367	0.00353628
324	0.00387962	0.00403907
325	0.00363976	0.00392149
326	0.00371197	0.00382193
327	0.00380018	0.00355072
328	0.00390608	0.00356165
329	0.00362488	0.00387156
330	0.00404497	0.00397786
331	0.00391324	0.0039738
332	0.00350563	0.00366142
333	0.00377843	0.00368996
334	0.00377417	0.00367544
335	0.00357162	0.00358782
336	0.00353497	0.00359719
337	0.00367003	0.00376788
338	0.00452668	0.00422224
339	0.00453712	0.00424528
340	0.00396678	0.00449279
341	0.00389709	0.00354835
342	0.00367438	0.00354675
343	0.00357246	0.00355764
344	0.0037502	0.00372672
345	0.00349458	0.00363018
346	0.00329279	0.00354671
347	0.0038701	0.00405028
348	0.00464124	0.0040955
349	0.0114954	0.0161161
350	0.033745	0.0647834
351	0.0270736	0.0206625
352	0.00471271	0.00416084
353	0.00443462	0.00365911
354	0.00475561	0.00365691
355	0.0049283	0.00408167
356	0.00466924	0.00419787
357	0.00426708	0.00418987
358	0.00459787	0.00452321
359	0.00451565	0.00441608
360	0.00761164	0.00814863
361	0.0219572	0.0270884
362	0.00837226	0.00978681
363	0.00594956	0.00593994
364	0.00466211	0.00649695
365	0.00403107	0.00440663
366	0.00413219	0.00425054
367	0.00402172	0.00431672
368	0.00437787	0.00431399
369	0.00418475	0.00446289
370	0.00393872	0.00438723
371	0.00375903	0.00425085
372	0.00441691	0.00423124
373	0.00329183	0.0042894
374	0.0031352	0.00470315
375	0.00322282	0.00459945
376	0.00338571	0.00446611
377	0.00324232	0.00498727
378	0.00336966	0.00493906
379	0.00346661	0.00461949
380	0.00378656	0.00543416
381	0.0043799	0.00572305
382	0.00329991	0.00459753
383	0.00308753	0.00428857
384	0.00323872	0.00459235
385	0.00308132	0.00472391
386	0.00302324	0.00461049
387	0.00319148	0.00485243
388	0.00316495	0.00492336
389	0.00336447	0.00497391
390	0.00344918	0.00524523
391	0.00347013	0.00590462
392	0.0030849	0.00551412
393	0.00295208	0.00521643
394	0.00306239	0.00582809
395	0.00342372	0.00565289
396	0.00325002	0.00411529
397	0.00344184	0.0042236
398	0.0070619	0.00605051
399	0.0358861	0.0412864
400	0.0593452	0.171599
401	0.046494	0.0507942
402	0.00671423	0.00452436
403	0.00356178	0.00381123
404	0.00314814	0.00388259
405	0.00322079	0.00374136
406	0.00306787	0.00365652
407	0.00316751	0.00363211
408	0.00602258	0.00643656
409	0.00632344	0.00678749
410	0.00358825	0.00396486
411	0.00356249	0.00418392
412	0.00318654	0.00347629
413	0.00334485	0.00352908
414	0.00313032	0.00387459
415	0.0029523	0.00402029
416	0.00298378	0.00375799
417	0.00308206	0.00368843
418	0.00349974	0.00392168
419	0.00336171	0.0041972
420	0.00341251	0.0048233
421	0.00380676	0.00435195
422	0.00316985	0.00343375
423	0.00297885	0.0036119
424	0.00301577	0.00388425
425	0.00308454	0.00386338
426	0.00298108	0.00370522
427	0.00325294	0.00362895
428	0.00336423	0.0038806
429	0.00315376	0.00415909
430	0.0030845	0.00401618
431	0.0031762	0.00378971
432	0.00313056	0.0037046
433	0.00309086	0.00363287
434	0.00306912	0.00325008
435	0.0029889	0.00347335
436	0.00309941	0.00374949
437	0.00317585	0.00377313
438	0.00352244	0.0039075
439	0.00389683	0.00461434
440	0.00361745	0.00413684
441	0.00364293	0.00382365
442	0.00350473	0.0040933
443	0.00312007	0.00384848
444	0.00329589	0.00409024
445	0.00324467	0.00383888
446	0.00323278	0.00378715
447	0.00355076	0.00409478
448	0.00425868	0.00428695
449	0.0173151	0.0188069
450	0.0226231	0.0644099
451	0.0164281	0.0207791
452	0.00434031	0.00436956
453	0.00314424	0.00371651
454	0.00322238	0.00363615
455	0.00313876	0.00370652
456	0.00323572	0.00367378
457	0.00308552	0.00406189
458	0.00651794	0.0081262
459	0.00605357	0.00737186
460	0.00374416	0.00475408
461	0.00482321	0.00641661
462	0.00381773	0.00444883
463	0.00375055	0.00383559
464	0.00333316	0.00382039
465	0.00299353	0.00342962
466	0.00306984	0.00333286
467	0.00293521	0.00362937
468	0.00292659	0.00347575
469	0.00309595	0.00357644
470	0.00292661	0.00348119
471	0.00303366	0.00369928
472	0.00348589	0.00363351
473	0.00327736	0.00367326
474	0.00325089	0.00361608
475	0.00307059	0.00371424
476	0.00303652	0.00385792
477	0.00312328	0.00389151
478	0.0031276	0.00384842
479	0.00333881	0.00438087
480	0.00377035	0.00469635
481	0.00572565	0.00642976
482	0.00462811	0.00567361
483	0.0031287	0.00354803
484	0.00307929	0.00359492
485	0.00337169	0.00378783
486	0.00304303	0.00361273
487	0.00308588	0.00351121
488	0.00308542	0.00354914
489	0.0033395	0.00364589
490	0.00343224	0.00399146
491	0.00346149	0.00409097
492	0.00340129	0.00419269
493	0.00319017	0.00360571
494	0.003288	0.00348838
495	0.00334682	0.0038693
496	0.00367769	0.00417257
497	0.00354742	0.00373256
498	0.00412309	0.00442322
499	0.00775632	0.00932947
500	0.00474098	0.0101002
