# Supplementary material for: Cortical plasticity is associated with blood–brain barrier modulation
Source: eLife. 2024 Jul 18;12:RP89611. doi: 10.7554/eLife.89611 (PMC11257677; doi:10.7554/eLife.89611)
Supplement: Figure 3—figure supplement 1—source data 1. [file elife-89611-fig3-figsupp1-data1.xlsx]

## Sheet: Figure 3 - figure supplement 1b
Uncropped gel blot image

## Sheet: Figure 3 - figure supplement 1c
sham			0.5h			4h			24h
Mean	SEM	N	Mean	SEM	N	Mean	SEM	N	Mean	SEM	N
1.125	0.007885	8	1.324	0.008933	8	1.174	0.01164	8	1.303	0.05966	8
