# Supplementary material for: Cortical plasticity is associated with blood–brain barrier modulation
Source: eLife. 2024 Jul 18;12:RP89611. doi: 10.7554/eLife.89611 (PMC11257677; doi:10.7554/eLife.89611)
Supplement: Figure 3—figure supplement 2—source data 1. [file elife-89611-fig3-figsupp2-data1.xlsx]

## Sheet: Figure 3 - figure supplement 2a
	BL	CNQX
0	-2.355	1.16509
1	-1.37399	1.70835
2	-1.72761	2.19289
3	-1.5451	1.84539
4	-2.45767	0.964421
5	-4.31132	-0.425559
6	-4.7562	-2.8825
7	-3.21054	-5.27581
8	-1.85879	-4.95768
9	-0.136315	-4.66402
10	0.536705	-2.53989
11	2.00252	-0.880728
12	1.98541	1.38533
13	1.63749	2.13416
14	2.13941	2.30056
15	3.75351	1.38533
16	3.53678	1.51258
17	1.76297	1.45385
18	1.59186	1.06231
19	4.88282	1.29234
20	9.62818	1.27276
21	18.9193	1.14062
22	30.9196	0.191122
23	44.2602	-0.543022
24	56.0039	-0.10743
25	64.5364	-0.127007
26	72.3959	-0.890517
27	77.8884	-0.817103
28	78.6413	-1.05203
29	79.7022	0.773543
30	80.552	1.86008
31	79.8619	2.38377
32	80.4265	3.19622
33	81.4417	3.9842
34	84.1167	3.59755
35	86.3582	3.93036
36	85.805	4.2387
37	83.0559	4.49321
38	81.4189	5.21756
39	80.1299	3.75417
40	79.8505	2.59422
41	79.3485	2.52081
42	81.7155	2.66764
43	82.9019	4.00378
44	81.8125	4.95817
45	79.4398	4.64983
46	79.1888	5.07563
47	79.9474	4.41
48	79.9132	3.44093
49	78.7839	2.92703
50	80.2326	2.37887
51	77.3523	2.03138
52	73.0746	2.06564
53	69.0137	0.386894
54	67.9528	-0.14169
55	66.3045	0.244959
56	62.6656	1.88455
57	60.715	3.66607
58	61.3994	5.92724
59	58.2282	8.08073
60	54.7662	8.6142
61	54.6407	6.09854
62	55.5076	4.4981
63	53.865	3.94994
64	48.498	4.38064
65	47.6652	3.6416
66	46.1025	4.35617
67	42.224	5.28119
68	40.2848	5.80977
69	42.2069	4.97774
70	40.7411	5.33013
71	38.0547	5.40844
72	35.7277	6.29431
73	35.9045	6.36772
74	34.8607	7.30743
75	31.3645	8.15414
76	30.4177	8.29118
77	29.4766	7.11655
78	25.7807	5.80488
79	21.5886	4.23381
80	19.0048	3.25985
81	16.2728	3.19133
82	13.6834	3.01513
83	9.78218	3.23537
84	8.0483	2.18799
85	4.48927	2.4376
86	0.856105	1.40491
87	-1.98997	3.16196
88	-3.06224	4.52257
89	-3.798	7.77728
90	-3.99192	10.5377
91	-2.25234	11.9668
92	-0.809336	12.4073
93	-0.41579	12.466
94	-1.97286	9.9944
95	-4.08318	8.73656
96	-5.36078	6.37751
97	-6.62127	4.79176
98	-6.55282	3.24027
99	-5.02427	1.77687

## Sheet: Figure 3 - figure supplement 2b
	BL	AP5
0	1.71301	0.558792
1	4.66629	2.01367
2	2.77534	2.57187
3	2.01578	2.81534
4	0.841898	2.01961
5	0.209811	-0.130048
6	1.7077	-0.759506
7	2.13263	-1.28801
8	0.162006	-1.28207
9	0.395719	-0.557604
10	-1.28277	-0.0290976
11	-3.85892	1.11699
12	-3.10998	0.849768
13	-2.30792	-0.314135
14	-1.85643	-1.36521
15	-3.15778	-1.13956
16	-5.52678	-1.27614
17	-2.03171	-1.38896
18	3.09404	-1.66806
19	4.45383	-2.03624
20	10.2701	-0.979222
21	12.5329	1.91866
22	13.0693	6.05764
23	13.4783	11.8475
24	12.0389	16.9603
25	10.8384	22.7739
26	12.655	26.7288
27	11.6724	29.8286
28	14.206	32.9699
29	18.8697	35.5234
30	25.0684	37.0079
31	30.6722	37.0851
32	35.2508	38.54
33	39.378	40.2977
34	45.3111	41.8595
35	45.2049	44.9712
36	46.74	46.5508
37	48.0095	47.5068
38	47.8023	48.1066
39	47.8395	48.7242
40	47.0693	49.1636
41	48.2538	50.1197
42	47.9829	50.3216
43	48.2485	51.6577
44	48.8009	53.0472
45	50.7237	53.9736
46	50.3997	54.1102
47	52.4766	54.894
48	55.7167	55.9748
49	58.7762	58.2848
50	59.711	58.4154
51	62.3881	59.3834
52	63.9285	59.9475
53	66.5312	60.4701
54	64.9908	60.2504
55	66.9455	60.8323
56	69.8829	62.0081
57	69.4208	63.9083
58	68.7568	63.4155
59	68.0344	65.0782
60	67.3545	63.8668
61	65.5911	63.0829
62	63.3495	60.5295
63	62.8927	59.4309
64	62.0854	57.875
65	62.6378	57.4831
66	63.3336	57.3168
67	66.1275	58.7955
68	66.5737	59.3062
69	66.9137	60.482
70	65.9576	59.7575
71	63.6204	59.8941
72	60.2794	57.6375
73	58.3725	53.7064
74	56.6356	50.2859
75	56.6568	47.0021
76	56.3328	45.6956
77	56.4338	46.3192
78	56.1522	46.9724
79	57.034	48.5401
80	57.8254	48.1541
81	57.3367	46.2004
82	56.3328	43.8013
83	55.9982	41.2182
84	55.7485	37.6493
85	52.0038	34.692
86	50.3253	31.9129
87	49.3586	29.4129
88	49.7357	27.4711
89	48.2963	26.0399
90	48.2166	24.2585
91	46.4053	23.344
92	45.8476	21.224
93	46.9684	21.4081
94	40.8015	19.8819
95	36.3822	18.7656
96	34.1195	19.0862
97	32.6269	19.2644
98	33.0253	19.4069
99	32.6641	19.971

## Sheet: Figure 3 - figure supplement 2c
BL	AP5	BL	CNQX
38.8	34.5	36.7	3.3
26.6	52	56.3	7.83
		41.6	0.207

## Sheet: Figure 3 - figure supplement 2d
	BL	mbcd
0	-5.98902	2.30121
0.5	-3.33027	2.75689
1	1.78273	-0.281006
1.5	4.85053	-0.205058
2	5.87313	-2.86322
2.5	4.85053	-1.64806
3	1.78273	-2.40753
3.5	-4.7619	-5.14164
4	-6.46624	-4.00243
4.5	-3.33027	-0.584795
5	0.828306	0.0987317
5.5	2.19177	3.8961
6	2.19177	4.19989
6.5	0.828306	6.85805
7	-3.33027	6.85805
7.5	-6.46624	5.79479
8	-3.33027	1.23794
8.5	0.828306	-1.79995
9	2.19177	-3.3189
9.5	2.19177	-3.3189
10	0.828306	-1.79995
10.5	-1.89863	1.23794
11	-5.98902	5.79479
11.5	-6.94345	8.45295
12	-6.94345	4.19989
12.5	-4.55738	2.30121
13	-4.28469	2.75689
13.5	-0.876027	1.31389
14	1.16917	-1.26832
14.5	1.85091	-4.23027
15	-0.262467	-6.81249
15.5	0.0783993	-8.25549
16	-1.62593	-14.4072
16.5	-0.876027	-16.0021
17	-2.92123	-8.78712
17.5	-3.26209	-2.78727
18	-1.89863	1.23794
18.5	-1.89863	8.377
19	-4.69373	12.8579
19.5	-1.9668	13.9212
20	0.351092	7.61753
20.5	1.57821	6.70616
21	6.28217	13.0857
21.5	6.41852	19.3894
22	12.0087	24.0981
22.5	19.576	31.7688
23	27.8249	42.7812
23.5	39.9598	54.9328
24	47.2543	67.616
24.5	52.1628	76.9575
25	55.7078	83.2612
25.5	54.4125	83.4131
26	55.9805	80.1473
26.5	62.1161	74.6032
27	65.4566	77.9449
27.5	68.388	86.2231
28	69.547	100.273
28.5	72.8193	103.463
29	75.4099	106.729
29.5	80.4547	106.957
30	87.272	107.64
30.5	91.3624	106.425
31	88.2265	107.564
31.5	84.5451	109.463
32	78.1368	112.121
32.5	72.7511	110.526
33	70.5014	108.931
33.5	66.8201	109.995
34	66.8882	112.957
34.5	65.4566	117.058
35	67.7745	119.944
35.5	73.1602	128.298
36	77.8641	130.5
36.5	81.2046	130.804
37	86.9994	128.45
37.5	84.8178	129.285
38	85.1587	125.868
38.5	80.6592	123.21
39	81.0683	121.311
39.5	81.1364	125.184
40	80.1138	125.564
40.5	79.4321	124.045
41	80.5229	124.045
41.5	76.7052	125.564
42	77.7278	121.994
42.5	77.6596	125.032
43	81.75	128.07
43.5	84.0679	131.108
44	85.3632	134.146
44.5	89.4536	132.171
45	88.9764	131.032
45.5	88.4992	129.133
46	92.5896	124.88
46.5	95.3165	129.133
47	93.8167	131.032
47.5	97.1572	133.766
48	101.588	129.893
48.5	101.179	128.678
49	99.7478	130.956
49.5	101.111	130.121
50	103.838	130.425
50.5	103.429	136.121
51	100.634	142.196
51.5	102.338	145.234
52	107.11	138.627
52.5	107.383	137.488
53	108.406	138.627
53.5	108.747	138.627
54	108.406	135.893
54.5	107.383	138.095
55	105.679	147.665
55.5	104.724	150.323
56	103.77	146.07
56.5	102.066	144.171
57	101.043	143.032
57.5	99.2705	142.652
58	100.566	134.829
58.5	104.247	140.526
59	111.065	151.538
59.5	116.518	157.842
60	116.109	162.702
60.5	115.087	165.36
61	112.019	162.626
61.5	105.474	158.753
62	105.202	154.576
62.5	105.952	151.918
63	108.406	152.601
63.5	108.747	157.462
64	106.974	167.335
64.5	109.769	173.791
65	107.383	173.411
65.5	104.315	171.208
66	105.065	166.348
66.5	104.384	151.386
67	105.133	144.855
67.5	102.066	149.411
68	99.6796	161.639
68.5	102.475	172.272
69	102.134	177.892
69.5	100.089	179.335
70	100.839	177.436
70.5	99.1342	165.588
71	100.907	158.069
71.5	96.4073	157.462
72	96.8163	158.677
72.5	95.4528	160.652
73	96.8163	159.133
73.5	96.4073	160.728
74	102.338	159.588
74.5	99.6114	155.715
75	98.657	154.956
75.5	92.7941	155.715
76	93.2031	159.588
76.5	90.1353	160.728
77	88.0901	159.133
77.5	90.1353	162.247
78	97.7026	159.209
78.5	97.9753	156.626
79	97.6344	153.664
79.5	96.68	149.487
80	95.7937	150.703
80.5	90.408	148.044
81	82.6363	148.12
81.5	79.0912	150.095
82	75.8871	149.715
82.5	70.5696	148.576
83	65.9338	148.272
83.5	64.7749	144.551
84	61.5707	141.589
84.5	53.8671	141.741
85	48.9587	136.5
85.5	42.9594	131.64
86	38.6645	129.513
86.5	34.3696	126.627
87	31.4381	124.501
87.5	31.2336	118.045
88	32.0517	115.463
88.5	26.2569	117.513
89	25.7116	115.691
89.5	21.3485	113.944
90	19.7805	110.602
90.5	16.44	108.02
91	13.4404	103.539
91.5	11.4633	97.919
92	9.75901	98.5266
92.5	8.32737	97.6153
93	13.8494	94.0457
93.5	15.1447	81.8941
94	18.8942	75.9702
94.5	19.1669	71.1855
95	21.2121	69.059
95.5	20.5304	66.0971
96	17.1217	69.6666
96.5	15.4856	71.2615
97	14.872	69.8185
97.5	12.895	62.6794
98	11.6679	60.6288
98.5	6.62304	52.7303
99	4.37332	47.9456
99.5	0.351092	41.1863

## Sheet: Figure 3 - figure supplement 2e
	BL	SJN
0	2.79485	0.111565
1	2.9135	-0.893859
2	2.61687	-2.64083
3	1.38584	-3.30888
4	-0.149244	-3.32224
5	-1.12072	-2.70095
6	-2.75592	-2.62747
7	-3.06738	-1.82914
8	-2.83007	-2.23331
9	-0.790715	-1.64208
10	0.399529	-1.25461
11	0.814817	0.926594
12	1.35988	2.72032
13	1.52303	3.57544
14	0.699871	3.28817
15	0.518183	2.70028
16	0.0769395	1.84183
17	-1.19117	1.922
18	-3.13783	1.71156
19	-3.04513	1.61803
20	0.84448	2.13578
21	6.43603	4.19005
22	14.2078	6.18086
23	22.7732	9.70485
24	30.3744	14.5082
25	35.1539	18.3595
26	36.6371	19.9428
27	36.27	20.5474
28	35.2133	21.2155
29	32.6882	21.5127
30	30.2335	20.8981
31	28.2646	21.7666
32	26.2734	22.1808
33	24.6939	20.9616
34	23.4665	20.347
35	22.5803	20.3804
36	22.5692	20.0764
37	22.7138	19.8326
38	23.0735	20.2702
39	23.3219	21.2823
40	23.5815	21.6464
41	23.8114	21.4493
42	24.3119	21.2355
43	24.2155	20.4839
44	24.8459	19.061
45	25.606	17.7015
46	26.2994	17.3875
47	26.1029	17.0067
48	27.0781	17.6748
49	28.2498	18.4464
50	28.2646	18.6301
51	27.1745	18.1624
52	26.7888	17.0602
53	26.5219	15.4101
54	26.6999	14.2243
55	26.5923	12.8948
56	27.7529	12.7378
57	28.691	12.1533
58	29.5438	11.5286
59	28.4537	12.2301
60	28.4824	12.4405
61	28.4926	12.6911
62	28.8755	12.337
63	28.9821	11.8727
64	29.0572	10.5666
65	28.9079	9.61801
66	30.0657	9.19045
67	28.6845	9.60798
68	28.9849	9.45099
69	28.7086	9.38085
70	28.7819	8.80966
71	28.6048	7.9345
72	28.0588	7.97459
73	28.2414	9.05016
74	29.2528	10.3562
75	28.0227	10.7437
76	27.6491	11.522
77	27.1522	10.9675
78	26.8408	10.1291
79	25.9768	8.55914
80	24.26	7.68732
81	22.7806	6.59171
82	21.2307	6.42136
83	18.4386	6.70862
84	16.3844	7.41342
85	15.0273	6.71864
86	14.1411	6.78545
87	13.711	5.53284
88	13.7147	3.84934
89	13.4811	2.51657
90	12.7988	1.54121
91	11.019	0.856448
92	9.29485	-0.215782
93	7.97853	-1.11766
94	7.73381	0.652691
95	7.82651	2.44976
96	8.21584	3.96625
97	7.80426	5.09861
98	6.96256	5.15205
99	5.63512	4.20341
