# Supplementary material for: Cortical plasticity is associated with blood–brain barrier modulation
Source: eLife. 2024 Jul 18;12:RP89611. doi: 10.7554/eLife.89611 (PMC11257677; doi:10.7554/eLife.89611)
Supplement: Figure 3—source data 1. [file elife-89611-fig3-data1.xlsx]

## Sheet: Figure 3c
30' stim	mβcd	mβcd + 30' stim	SJN	SJN + 30' stim	AP5	AP5 + 30' stim	CNQX	CNQX + 30' stim
17.9588	-2.58483	-4.57084	-16.8879	-19.1646	2.89655	28.2588	-4.56803	-5.87901
7.49111	-21.2226	-8.95073	-5.47374	-6.01863	4.01505	15.2202	-3.66712	0.673615
23.3752	3.6838	11.4671	7.70624	4.55302	2.02625	17.1015	-1.89853	-0.0308786
9.01059	-4.07373	-1.33263	-18.2353	-17.3853		0.898474	-22.5445	-13.7515
13.0988	23.9907	19.8784	6.80708	-2.94442			-10.2356
17.776	-25.2465	-11.2809
7.08932
16.6285

## Sheet: Figure 3d left
	bl	cnqx	cnqx stim
0	1.54917	0.367703	2.2746
1	1.4857	0.33262	2.40192
2	1.55687	0.302248	2.63558
3	1.77196	0.278163	2.96649
4	2.12928	0.261583	3.37545
5	2.61558	0.253412	3.83419
6	3.20559	0.253956	4.30774
7	3.86171	0.262762	4.75347
8	4.53717	0.278871	5.12625
9	5.17665	0.300683	5.37813
10	5.7204	0.326024	5.46272
11	6.10673	0.352225	5.33849
12	6.2747	0.376025	4.96974
13	6.17009	0.393948	4.33147
14	5.7467	0.402497	3.40913
15	4.97144	0.398056	2.20194
16	3.82634	0.377467	0.7233
17	2.30982	0.337896	-0.9999
18	0.439109	0.277061	-2.92684
19	-1.75104	0.193663	-5.00549
20	-4.20843	0.086885	-7.17335
21	-6.86514	-0.04281	-9.36117
22	-9.64053	-0.19398	-11.4962
23	-12.4453	-0.36439	-13.5056
24	-15.1852	-0.55062	-15.3199
25	-17.7657	-0.74891	-16.8759
26	-20.0963	-0.9545	-18.1204
27	-22.0941	-1.16208	-19.0133
28	-23.6901	-1.36637	-19.5289
29	-24.8305	-1.56175	-19.657
30	-25.4803	-1.74323	-19.4032
31	-25.624	-1.90588	-18.7885
32	-25.2663	-2.0453	-17.8491
33	-24.4329	-2.15817	-16.6328
34	-23.1672	-2.24182	-15.1972
35	-21.5285	-2.29495	-13.6057
36	-19.5885	-2.31699	-11.9254
37	-17.4274	-2.30836	-10.2234
38	-15.1308	-2.27076	-8.5627
39	-12.7845	-2.20653	-6.99996
40	-10.4694	-2.11911	-5.58221
41	-8.2593	-2.01223	-4.34633
42	-6.21664	-1.89003	-3.31636
43	-4.39174	-1.75716	-2.50402
44	-2.8195	-1.61793	-1.90827
45	-1.51875	-1.47684	-1.51644
46	-0.49331	-1.3378	-1.30703
47	0.26792	-1.20424	-1.24935
48	0.787088	-1.07933	-1.30835
49	1.09731	-0.96502	-1.44519
50	1.23868	-0.86294	-1.62105
51	1.25527	-0.77382	-1.8002
52	1.19294	-0.69772	-1.94968
53	1.09395	-0.63437	-2.04383
54	0.997521	-0.58243	-2.06306
55	0.935331	-0.54043	-1.99637
56	0.931048	-0.50654	-1.84124
57	1.00009	-0.47872	-1.60166
58	1.14725	-0.45517	-1.2892
59	1.3703	-0.43371	-0.91986
60	1.65848	-0.41252	-0.51397
61	1.9949	-0.39	-0.09402
62	2.35893	-0.36486	0.317856
63	2.72671	-0.33632	0.7006
64	3.07563	-0.30375	1.03662
65	3.38437	-0.26692	1.31214
66	3.63479	-0.22598	1.51834
67	3.81377	-0.18126	1.65204
68	3.91339	-0.13339	1.71523
69	3.93263	-0.08322	1.71508
70	3.8766	-0.03159	1.66286
71	3.7554	0.020538	1.57293
72	3.58357	0.072346	1.46181
73	3.37875	0.12317	1.34643
74	3.16061	0.172142	1.24319
75	2.94935	0.218749	1.16657
76	2.7636	0.262519	1.12794
77	2.61908	0.303259	1.13533
78	2.52764	0.341052	1.19235
79	2.49642	0.375703	1.29855
80	2.52775	0.407322	1.44932
81	2.61898	0.435975	1.63634
82	2.76244	0.46192	1.84881
83	2.94656	0.48551	2.07381
84	3.15638	0.506764	2.29773
85	3.37523	0.525802	2.50716
86	3.58635	0.542617	2.68986
87	3.77351	0.557296	2.8361
88	3.92283	0.569934	2.93885
89	4.02295	0.580408	2.99455
90	4.06667	0.588656	3.00326
91	4.05149	0.594546	2.96842
92	3.9792	0.598047	2.89693
93	3.85641	0.599248	2.79806
94	3.69278	0.598174	2.68303
95	3.50149	0.59502	2.56401
96	3.29771	0.589944	2.45306
97	3.09707	0.583174	2.36155
98	2.91533	0.575145	2.29877
99	2.76594	0.56619	2.27163
100	2.66039	0.55685	2.28407
101	2.60642	0.547502	2.33663
102	2.60728	0.538472	2.4268
103	2.66246	0.530182	2.54873
104	2.76672	0.522818	2.69409
105	2.9115	0.516688	2.85258
106	3.08469	0.511829	3.01276
107	3.27155	0.508162	3.16314
108	3.45676	0.50556	3.29265
109	3.62458	0.503719	3.39182
110	3.76084	0.502392	3.45338
111	3.85324	0.5012	3.47297
112	3.89261	0.499751	3.44949
113	3.87436	0.497604	3.38498
114	3.79755	0.494424	3.28462
115	3.66597	0.489934	3.15635
116	3.48719	0.483997	3.01035
117	3.27243	0.476566	2.85828
118	3.03645	0.467617	2.71217
119	2.79477	0.457378	2.58372
120	2.56392	0.446102	2.48327
121	2.35934	0.434261	2.41919
122	2.19466	0.422315	2.397
123	2.0814	0.410731	2.41899
124	2.02623	0.40003	2.48406
125	2.03218	0.390675	2.58763
126	2.09719	0.383148	2.72218
127	2.21471	0.377754	2.87753
128	2.37475	0.374742	3.04176
129	2.56326	0.374154	3.20212
130	2.76467	0.375998	3.34591
131	2.96181	0.380092	3.46163
132	3.13771	0.386148	3.53967
133	3.27712	0.393884	3.57336
134	3.36739	0.402856	3.55947
135	3.40012	0.412748	3.49848
136	3.37115	0.423029	3.3948
137	3.28122	0.433357	3.25625
138	3.13588	0.443509	3.09388
139	2.94558	0.453349	2.92096
140	2.72498	0.462925	2.75198
141	2.49137	0.472073	2.60184
142	2.26378	0.480971	2.4842
143	2.0611	0.489852	2.41089
144	1.90103	0.499059	2.39047
145	1.79873	0.508955	2.42762
146	1.76477	0.519532	2.52268
147	1.80503	0.530994	2.67128
148	1.91957	0.5434	2.86482
149	2.10225	0.556671	3.09053
150	2.3417	0.570622	3.33263
151	2.62069	0.5846	3.57327
152	2.91877	0.598056	3.79397
153	3.21331	0.610303	3.97714
154	3.48038	0.620426	4.10716
155	3.69778	0.627636	4.17209
156	3.84531	0.630898	4.1645
157	3.90838	0.629512	4.08259
158	3.87872	0.622896	3.93051
159	3.75494	0.610523	3.71817
160	3.5434	0.592343	3.46111
161	3.2577	0.56843	3.17953
162	2.91918	0.539435	2.89692
163	2.55486	0.5062	2.63853
164	2.19624	0.469831	2.42914
165	1.87597	0.43179	2.29124
166	1.62663	0.393668	2.2437
167	1.47799	0.357387	2.29899

## Sheet: Figure 3d right
	bl	ap5	ap5 stim
0	2.06647	2.58716	3.98076
1	2.19779	2.91001	4.68465
2	2.41654	3.36819	5.50123
3	2.71295	3.93857	6.37571
4	3.06943	4.5859	7.24161
5	3.46233	5.26534	8.02564
6	3.86113	5.92241	8.64915
7	4.2315	6.49785	9.03526
8	4.53562	6.92898	9.11125
9	4.73433	7.15369	8.81404
10	4.79051	7.11528	8.09528
11	4.66954	6.76412	6.92323
12	4.34335	6.0633	5.28763
13	3.79067	4.98947	3.19948
14	2.99924	3.53603	0.692851
15	1.96763	1.71468	-2.17597
16	0.704605	-0.445227	-5.33108
17	-0.769311	-2.89607	-8.67918
18	-2.42379	-5.57476	-12.1149
19	-4.21893	-8.40439	-15.5243
20	-6.10686	-11.2978	-18.7911
21	-8.03446	-14.1621	-21.8027
22	-9.94476	-16.9021	-24.4547
23	-11.7807	-19.4257	-26.6573
24	-13.4865	-21.6478	-28.3383
25	-15.011	-23.4943	-29.4472
26	-16.3102	-24.906	-29.9579
27	-17.3484	-25.8413	-29.8689
28	-18.1009	-26.2783	-29.204
29	-18.5533	-26.2144	-28.0091
30	-18.7033	-25.6673	-26.3505
31	-18.5601	-24.6736	-24.3115
32	-18.1435	-23.2862	-21.9864
33	-17.4829	-21.5716	-19.477
34	-16.6147	-19.6058	-16.8858
35	-15.581	-17.4706	-14.3116
36	-14.4274	-15.2499	-11.8453
37	-13.2002	-13.0246	-9.56454
38	-11.9446	-10.8695	-7.53163
39	-10.7019	-8.84952	-5.79025
40	-9.50837	-7.01757	-4.36588
41	-8.39372	-5.41243	-3.26429
42	-7.37998	-4.05784	-2.47386
43	-6.48145	-2.9625	-1.96712
44	-5.70386	-2.1205	-1.70348
45	-5.04608	-1.51418	-1.63424
46	-4.49988	-1.11441	-1.70386
47	-4.05198	-0.884966	-1.85628
48	-3.68512	-0.784276	-2.03695
49	-3.37924	-0.768854	-2.19679
50	-3.11432	-0.797293	-2.296
51	-2.87016	-0.830547	-2.30357
52	-2.62937	-0.836488	-2.20105
53	-2.37731	-0.78972	-1.98088
54	-2.10308	-0.673556	-1.64698
55	-1.80087	-0.480898	-1.21393
56	-1.46836	-0.212042	-0.703433
57	-1.10818	0.124055	-0.143874
58	-0.726173	0.512846	0.4338
59	-0.331087	0.934784	0.997676
60	0.0658882	1.36726	1.51756
61	0.45336	1.78764	1.96795
62	0.819448	2.17393	2.32886
63	1.15375	2.50753	2.58797
64	1.44768	2.77384	2.74058
65	1.69492	2.96349	2.78992
66	1.8926	3.07326	2.74688
67	2.04065	3.10555	2.62832
68	2.1423	3.06847	2.45609
69	2.20344	2.97467	2.25476
70	2.23204	2.8403	2.04984
71	2.23792	2.68391	1.86602
72	2.23145	2.52456	1.72487
73	2.22316	2.38065	1.64374
74	2.22271	2.26842	1.63427
75	2.23815	2.20068	1.70177
76	2.27575	2.18624	1.84532
77	2.33909	2.22899	2.05754
78	2.42927	2.32808	2.32586
79	2.54471	2.47797	2.63323
80	2.68136	2.66892	2.95969
81	2.83336	2.88816	3.28425
82	2.99314	3.12055	3.58612
83	3.15239	3.35018	3.84666
84	3.30259	3.56145	4.05052
85	3.4357	3.74021	4.18681
86	3.54499	3.87506	4.25008
87	3.6252	3.95788	4.2403
88	3.67317	3.98474	4.16304
89	3.68803	3.95584	4.02876
90	3.67126	3.87557	3.85202
91	3.62661	3.75217	3.65042
92	3.55963	3.59692	3.44297
93	3.4773	3.42341	3.24882
94	3.38755	3.24626	3.08569
95	3.29869	3.08013	2.96855
96	3.21873	2.93863	2.90859
97	3.15466	2.83321	2.91224
98	3.11199	2.7724	2.98093
99	3.09444	2.76109	3.11083
100	3.1037	2.80015	3.29329
101	3.13917	2.88662	3.51556
102	3.19806	3.01375	3.7617
103	3.27562	3.17173	4.014
104	3.36561	3.34827	4.25416
105	3.4608	3.52958	4.46481
106	3.55342	3.70167	4.6309
107	3.63576	3.85122	4.74074
108	3.70088	3.96672	4.78714
109	3.74318	4.0393	4.7677
110	3.7588	4.06334	4.6852
111	3.74588	4.03722	4.54742
112	3.7047	3.96316	4.36648
113	3.63783	3.84727	4.15807
114	3.54992	3.69892	3.94003
115	3.44727	3.53012	3.73123
116	3.3374	3.35473	3.54999
117	3.22842	3.18721	3.41274
118	3.12852	3.04166	3.3326
119	3.04535	2.9305	3.31831
120	2.98532	2.86365	3.37364
121	2.95302	2.84777	3.49688
122	2.95098	2.88553	3.68103
123	2.97936	2.97545	3.91402
124	3.03595	3.11183	4.17966
125	3.11624	3.28522	4.45893
126	3.21362	3.48309	4.73129
127	3.32009	3.6907	4.97638
128	3.42672	3.89225	5.1754
129	3.52436	4.072	5.31271
130	3.60428	4.21559	5.37726
131	3.65889	4.31128	5.36347
132	3.68248	4.35075	5.2719
133	3.67169	4.32998	5.10924
134	3.62575	4.24966	4.88796
135	3.5467	4.1152	4.62576
136	3.43922	3.93661	4.3441
137	3.31051	3.72764	4.06678
138	3.16976	3.50499	3.81803
139	3.02736	3.28695	3.62056
140	2.89435	3.09214	3.49403
141	2.78134	2.93799	3.45303
142	2.69784	2.83923	3.506
143	2.65137	2.80678	3.65406
144	2.64669	2.84662	3.8908
145	2.68569	2.95923	4.20251
146	2.76663	3.13922	4.56881
147	2.88449	3.37554	4.96402
148	3.03096	3.65216	5.35879
149	3.19488	3.94903	5.72249
150	3.3635	4.24354	6.02537
151	3.52282	4.51225	6.24103
152	3.65897	4.73252	6.34858
153	3.75907	4.88455	6.33457
154	3.81225	4.95298	6.1946
155	3.81111	4.92832	5.9341
156	3.75199	4.80824	5.56852
157	3.63575	4.59798	5.12272
158	3.46787	4.31056	4.62973
159	3.25807	3.96607	4.12845
160	3.02057	3.59075	3.66168
161	2.77254	3.21522	3.27223
162	2.53344	2.87255	3.0004
163	2.32354	2.59587	2.88042
164	2.16205	2.41531	2.93677
165	2.06652	2.3564	3.18302
166	2.05013	2.43634	3.61766

## Sheet: Figure 3e left
BL	CNQX	CNQX+ 30' stim
4.161	1.914	0.1125
18.64	0.2174	1.934
25.62	2.317	19.66
35.02	1.407
25.71	5.089	17.52

## Sheet: Figure 3e right
BL	AP5	AP5+ 30' stim
11.3	29.11
4.446	12.21	7.513
18.7	26.28	29.96
5.42	6.849	7.829
15.78	18.07	3.083

## Sheet: Figure 3f left
	BL	SJN	SJN + 30' stim
0	2.99883	1.06362	2.23083
1	2.93492	1.03531	2.22851
2	2.8662	1.01532	2.22007
3	2.79799	1.00662	2.20582
4	2.73616	1.01143	2.18678
5	2.68636	1.03058	2.16454
6	2.65376	1.06384	2.14114
7	2.64256	1.10927	2.11885
8	2.65566	1.16344	2.10015
9	2.69361	1.22145	2.08764
10	2.75454	1.27635	2.08346
11	2.83403	1.32025	2.08935
12	2.92486	1.34404	2.10584
13	3.01767	1.33817	2.1327
14	3.09963	1.29309	2.16854
15	3.15619	1.19914	2.2103
16	3.17127	1.04802	2.25385
17	3.12796	0.832699	2.29296
18	3.01014	0.548291	2.32072
19	2.80108	0.192448	2.32894
20	2.48659	-0.234859	2.3083
21	2.05504	-0.73031	2.24951
22	1.49851	-1.28769	2.14245
23	0.813959	-1.89769	1.97844
24	0.00147602	-2.54828	1.74921
25	-0.932819	-3.22533	1.4478
26	-1.97791	-3.91248	1.06959
27	-3.11739	-4.59218	0.611609
28	-4.32996	-5.24628	0.0746086
29	-5.59162	-5.85687	-0.538548
30	-6.87426	-6.40708	-1.222
31	-8.14792	-6.8813	-1.96664
32	-9.38133	-7.26624	-2.76103
33	-10.5435	-7.55146	-3.59034
34	-11.6056	-7.72988	-4.43847
35	-12.5406	-7.798	-5.28769
36	-13.3254	-7.75563	-6.11912
37	-13.9415	-7.6062	-6.91395
38	-14.3756	-7.35667	-7.65318
39	-14.6209	-7.0171	-8.31968
40	-14.6756	-6.60009	-8.89801
41	-14.5439	-6.11992	-9.37486
42	-14.236	-5.59221	-9.74008
43	-13.7673	-5.03336	-9.98639
44	-13.1576	-4.45968	-10.1106
45	-12.4291	-3.88663	-10.113
46	-11.6067	-3.32826	-9.99678
47	-10.7169	-2.79672	-9.76913
48	-9.78612	-2.30216	-9.43969
49	-8.84012	-1.85223	-9.02119
50	-7.90173	-1.45172	-8.52794
51	-6.99174	-1.10308	-7.97541
52	-6.12735	-0.806161	-7.37995
53	-5.32247	-0.558861	-6.75786
54	-4.58659	-0.357254	-6.1253
55	-3.92489	-0.195634	-5.49678
56	-3.33925	-0.0677419	-4.88534
57	-2.82769	0.0333677	-4.30191
58	-2.38597	0.114524	-3.75543
59	-2.00673	0.182198	-3.25261
60	-1.68141	0.242562	-2.79727
61	-1.40077	0.300363	-2.39135
62	-1.15478	0.359413	-2.03417
63	-0.934486	0.42216	-1.72381
64	-0.73083	0.489871	-1.45665
65	-0.537004	0.562988	-1.22767
66	-0.347674	0.640567	-1.03163
67	-0.158862	0.721064	-0.862309
68	0.0311975	0.802264	-0.714238
69	0.223527	0.881767	-0.581824
70	0.416725	0.957316	-0.46008
71	0.608576	1.02653	-0.345253
72	0.796296	1.0876	-0.233855
73	0.976478	1.13908	-0.124059
74	1.1463	1.18031	-0.0143834
75	1.30247	1.21136	0.0956107
76	1.44257	1.23266	0.20537
77	1.56509	1.24541	0.314245
78	1.66928	1.25106	0.420708
79	1.75574	1.25158	0.523575
80	1.8255	1.24906	0.621431
81	1.88058	1.2454	0.712875
82	1.9237	1.24248	0.79707
83	1.95784	1.24176	0.873225
84	1.98639	1.24442	0.941355
85	2.0124	1.25118	1.00172
86	2.03862	1.26214	1.05489
87	2.06747	1.27705	1.10196
88	2.10047	1.29513	1.14403
89	2.13867	1.31538	1.18262
90	2.18219	1.33653	1.21911
91	2.23031	1.35721	1.25472
92	2.28189	1.37609	1.29072
93	2.33507	1.39196	1.32788
94	2.38796	1.4039	1.36686
95	2.43839	1.41124	1.40786
96	2.48412	1.41379	1.45068
97	2.5234	1.41173	1.49505
98	2.55477	1.40554	1.54019
99	2.57753	1.39611	1.58533
100	2.59144	1.38445	1.6295
101	2.59679	1.37188	1.67168
102	2.59467	1.35975	1.71113
103	2.58659	1.34919	1.747
104	2.57463	1.34131	1.77883
105	2.5609	1.33684	1.80633
106	2.54759	1.33632	1.82949
107	2.53688	1.33994	1.84867
108	2.5306	1.34733	1.86427
109	2.53033	1.35792	1.87698
110	2.53685	1.37079	1.88762
111	2.55042	1.38487	1.89707
112	2.57081	1.39896	1.90623
113	2.59711	1.41168	1.91583
114	2.62804	1.42186	1.92644
115	2.66172	1.42852	1.93851
116	2.69608	1.43094	1.95225
117	2.72916	1.42875	1.96764
118	2.75896	1.42181	1.98443
119	2.78384	1.41046	2.0021
120	2.80243	1.39543	2.02009
121	2.81383	1.37772	2.03771
122	2.81793	1.3585	2.05425
123	2.81505	1.339	2.06905
124	2.80615	1.32056	2.08146
125	2.79257	1.30445	2.09117
126	2.77602	1.29166	2.09793
127	2.75854	1.28287	2.10177
128	2.74212	1.27839	2.10293
129	2.72867	1.27817	2.10175
130	2.71985	1.28182	2.09895
131	2.71686	1.28848	2.09523
132	2.72047	1.297	2.09136
133	2.73074	1.30598	2.08817
134	2.74723	1.31393	2.08624
135	2.76889	1.31946	2.08623
136	2.79435	1.32115	2.08847
137	2.82183	1.31795	2.09307
138	2.84921	1.30914	2.10003
139	2.87451	1.29439	2.10892
140	2.89578	1.27397	2.11927
141	2.91167	1.24846	2.13032
142	2.9212	1.21904	2.14118
143	2.92384	1.18725	2.15117
144	2.9198	1.15486	2.15939
145	2.9098	1.12386	2.16526
146	2.89543	1.09608	2.1682
147	2.87866	1.07339	2.16787
148	2.8617	1.05731	2.16447
149	2.84693	1.04883	2.15825
150	2.83658	1.04852	2.14989
151	2.83277	1.05618	2.14014
152	2.83703	1.07116	2.12985
153	2.85023	1.09222	2.12029
154	2.87247	1.11744	2.11252
155	2.90288	1.14468	2.1076
156	2.93994	1.17142	2.10624
157	2.98117	1.19523	2.10884
158	3.02356	1.21388	2.11575
159	3.06373	1.22532	2.12675
160	3.09804	1.22823	2.14129
161	3.12318	1.22186	2.15835
162	3.13606	1.20633	2.1766
163	3.13447	1.18266	2.19471
164	3.11727	1.15257	2.21112
165	3.08434	1.11861	2.22428
166	3.0372	1.08384	2.23282
167	2.97823	1.05161	2.23568

## Sheet: Figure 3f right
	BL	mβcd	mβcd + 30' stim
0	1.96063	2.25447	1.93511
1	1.95319	2.22476	1.91565
2	1.95938	2.20966	1.9095
3	1.9794	2.21081	1.91595
4	2.01267	2.22843	1.93344
5	2.05655	2.26063	1.95804
6	2.10695	2.30416	1.98483
7	2.15771	2.35365	2.00709
8	2.20123	2.40208	2.01628
9	2.22938	2.44062	2.0034
10	2.23218	2.45855	1.95785
11	2.19936	2.4447	1.86948
12	2.12003	2.38695	1.72808
13	1.98406	2.27359	1.52394
14	1.78304	2.09343	1.24918
15	1.50915	1.83617	0.897206
16	1.15689	1.49404	0.464433
17	0.722851	1.06128	-0.05033
18	0.20688	0.535548	-0.64542
19	-0.38753	-0.08231	-1.31562
20	-1.05457	-0.78818	-2.0527
21	-1.78509	-1.57378	-2.84496
22	-2.56722	-2.42767	-3.67823
23	-3.38613	-3.33484	-4.5362
24	-4.22464	-4.2777	-5.40054
25	-5.06474	-5.23656	-6.25159
26	-5.88732	-6.18986	-7.06913
27	-6.67329	-7.11561	-7.83356
28	-7.40388	-7.99177	-8.5267
29	-8.06177	-8.79764	-9.13199
30	-8.63222	-9.51436	-9.63502
31	-9.10273	-10.1254	-10.0245
32	-9.46401	-10.6175	-10.2927
33	-9.71001	-10.9814	-10.436
34	-9.83851	-11.2119	-10.4546
35	-9.8514	-11.3082	-10.3518
36	-9.75354	-11.2733	-10.1349
37	-9.55305	-11.1141	-9.81429
38	-9.26075	-10.8414	-9.40343
39	-8.88984	-10.4691	-8.91767
40	-8.45553	-10.0134	-8.37339
41	-7.9735	-9.49164	-7.78789
42	-7.45964	-8.92221	-7.17857
43	-6.92945	-8.32357	-6.56218
44	-6.39743	-7.7136	-5.95408
45	-5.87683	-7.10859	-5.36737
46	-5.37879	-6.5226	-4.81329
47	-4.91184	-5.96726	-4.30057
48	-4.48229	-5.45165	-3.83528
49	-4.09379	-4.98204	-3.42072
50	-3.74777	-4.56149	-3.05712
51	-3.44366	-4.19044	-2.74305
52	-3.17849	-3.86661	-2.4749
53	-2.94807	-3.58614	-2.2476
54	-2.74684	-3.3434	-2.05479
55	-2.56858	-3.13134	-1.88892
56	-2.4073	-2.94269	-1.74304
57	-2.25664	-2.76967	-1.61007
58	-2.11108	-2.60553	-1.48382
59	-1.96564	-2.44402	-1.35874
60	-1.81628	-2.27965	-1.22998
61	-1.66066	-2.10871	-1.09468
62	-1.49711	-1.92842	-0.95095
63	-1.32545	-1.73807	-0.7984
64	-1.14622	-1.5379	-0.63753
65	-0.9608	-1.32909	-0.46946
66	-0.77159	-1.11414	-0.29669
67	-0.58107	-0.89581	-0.122
68	-0.39213	-0.67779	0.051593
69	-0.20743	-0.46346	0.221217
70	-0.02929	-0.25584	0.384463
71	0.14009	-0.05788	0.538853
72	0.299313	0.128492	0.682447
73	0.447446	0.301558	0.8143
74	0.584222	0.460719	0.934094
75	0.710048	0.606311	1.04223
76	0.825563	0.739031	1.13936
77	0.932091	0.860549	1.22644
78	1.0311	0.972528	1.30527
79	1.12418	1.07716	1.37774
80	1.21296	1.17685	1.44571
81	1.29864	1.27355	1.51072
82	1.38248	1.36934	1.5739
83	1.46535	1.46545	1.63651
84	1.5477	1.56287	1.69937
85	1.62966	1.6622	1.76273
86	1.71069	1.76317	1.82636
87	1.79029	1.86536	1.88952
88	1.8677	1.96757	1.95151
89	1.94206	2.06844	2.01138
90	2.01251	2.16665	2.06805
91	2.07789	2.26052	2.12043
92	2.13762	2.34877	2.16743
93	2.19132	2.43003	2.20847
94	2.23898	2.50333	2.24307
95	2.28082	2.56832	2.27121
96	2.31711	2.62482	2.29319
97	2.34864	2.67335	2.30958
98	2.37651	2.71447	2.32146
99	2.4019	2.74911	2.32982
100	2.42603	2.77873	2.33601
101	2.4498	2.80469	2.34146
102	2.47422	2.82859	2.34744
103	2.5001	2.85158	2.35532
104	2.52794	2.87459	2.36582
105	2.55787	2.89867	2.37962
106	2.58953	2.92428	2.39713
107	2.62246	2.95177	2.41828
108	2.65587	2.98072	2.44285
109	2.68868	3.01037	2.47004
110	2.7197	3.04009	2.49893
111	2.74762	3.06896	2.52861
112	2.77139	3.09608	2.55781
113	2.78997	3.12023	2.58545
114	2.80251	3.14021	2.61052
115	2.80845	3.1555	2.63214
116	2.80762	3.16575	2.64986
117	2.80039	3.17097	2.66318
118	2.78721	3.17118	2.67206
119	2.76888	3.16664	2.67684
120	2.7464	3.15835	2.67797
121	2.72102	3.14743	2.67623
122	2.69425	3.13512	2.67231
123	2.66723	3.12242	2.66701
124	2.64106	3.11012	2.66126
125	2.61663	3.09939	2.65572
126	2.59457	3.09099	2.65085
127	2.57542	3.0853	2.6469
128	2.55899	3.08216	2.64382
129	2.54493	3.08093	2.6415
130	2.5326	3.08119	2.63941
131	2.52113	3.08205	2.63674
132	2.50971	3.08238	2.63268
133	2.49711	3.08073	2.62641
134	2.48244	3.07565	2.61727
135	2.46496	3.06637	2.60459
136	2.44408	3.05214	2.58777
137	2.41972	3.03241	2.56664
138	2.39179	3.00691	2.54149
139	2.36099	2.97585	2.51299
140	2.32821	2.94031	2.48193
141	2.29457	2.90157	2.44936
142	2.26148	2.86104	2.41659
143	2.23021	2.82027	2.38525
144	2.20246	2.78098	2.35687
145	2.17946	2.7452	2.33267
146	2.16223	2.71453	2.31366
147	2.15142	2.68999	2.30057
148	2.14704	2.67219	2.29385
149	2.14914	2.66126	2.29326
150	2.15667	2.657	2.29792
151	2.16837	2.65845	2.30653
152	2.18254	2.66386	2.3175
153	2.1971	2.67118	2.32898
154	2.2103	2.67814	2.33872
155	2.21971	2.68252	2.34449
156	2.22353	2.68201	2.34423
157	2.22037	2.67442	2.33635
158	2.20923	2.65819	2.31975
159	2.1902	2.63257	2.29388
160	2.16331	2.59762	2.259
161	2.12995	2.5541	2.21615
162	2.09218	2.50353	2.16701
163	2.05256	2.44838	2.11397
164	2.01443	2.39211	2.06
165	1.98056	2.33832	2.00823
166	1.95434	2.29082	1.9621
167	1.93862	2.25299	1.92415

## Sheet: Figure 3g
	30' stim	Alb	AP5	AP5 +30' stim	CNQX	CNQX +30' stim	SJN	SJN +30' stim	MβCD	MβCD +30' stim
rat1	166.977	19.1172	157.611		-54.0014	-97.2963	-63.0796	-48.8601	-50.3726	-16.9038
rat2	42.9703	133.546	174.629	234.655	-101.166	-89.6245	-46.8801	-20.8975	14.8107	6.0806
rat3	51.087	18.6257	40.5348	60.2139	-90.9563	-23.2631	10.4874	-31.1308	12.5341	-37.1299
rat4	4.77299	50.0644	26.3653	44.4465	-95.9823		-72.1708	-53.8729	13.0709	-37.876
rat5	32.2254		14.512	-80.4626	-80.2061	-31.8553			47.0722	53.6882

## Sheet: Figure 3h
	30' stim	Alb	AP5	AP5 +30' stim	CNQX	CNQX +30' stim	SJN	SJN +30' stim	MβCD	MβCD +30' stim
rat1	120.803	133.237	174.817		-91.2367	-33.9378	-61.1555	-46.4698	-43.468	-0.417827
rat2	50.4702	136.697	188.364	99.2948	-89.3376	-97.7609	-51.3733	-9.18685	19.8496	2.66917
rat3	40.3809	22.3275	16.9297	34.2605	-15.6955	-87.0196	12.153	-28.6852	15.3601	-37.5306
rat4	15.436	69.3509	8.59805	6.0144	-93.105		-67.2123	-42.4306	20.1331	-44.1847
rat5	32.0475		5.50719	-82.746	-33.4493	-76.6029			52.4821	55.4443
