# Supplementary material for: Cortical plasticity is associated with blood–brain barrier modulation
Source: eLife. 2024 Jul 18;12:RP89611. doi: 10.7554/eLife.89611 (PMC11257677; doi:10.7554/eLife.89611)
Supplement: Figure 4—figure supplement 1—source data 1. [file elife-89611-fig4-figsupp1-data1.xlsx]

## Sheet: Figure 4 - figure supplement 1b
	jsd	spear	pear	s1	s2	timepoint
0	0.102489	0.982155	0.971832	sample21	sample29	24H
1	0.0305878	0.996403	0.996928	sample22	sample30	24H
2	0.112495	0.97973	0.969616	sample23	sample31	24H
3	0.0387381	0.995825	0.993186	sample24	sample32	24H
4	0.0831198	0.987161	0.981899	sample25	sample33	24H
5	0.0507021	0.993765	0.988812	sample26	sample34	24H
6	0.0673177	0.99157	0.982561	sample27	sample35	24H
7	0.0431825	0.994877	0.994918	sample28	sample36	24H
8	0.0312866	0.995811	0.997868	sample1	sample9	1H
9	0.0338767	0.995838	0.996763	sample2	sample10	1H
10	0.0513724	0.994131	0.991231	sample3	sample11	1H
11	0.0358639	0.994992	0.99643	sample4	sample12	1H
12	0.0280974	0.996589	0.997934	sample5	sample13	1H
13	0.0342558	0.996004	0.990004	sample6	sample14	1H
14	0.0415836	0.995544	0.989612	sample7	sample15	1H
15	0.0444697	0.994778	0.994063	sample8	sample16	1H

## Sheet: Figure 4 - figure supplement 1c
	I	C
	p value	p value
Slc10a3	0.963148	0.555128
Slc10a6	5.37e-06	0.061242
Slc10a7	0.865311	0.877596
Slc11a2	0.37305	0.165503
Slc12a2	0.758198	0.036294
Slc12a4	0.257473	0.254883
Slc12a5	0.152184	0.010961
Slc12a6	0.934776	0.186676
Slc12a7	0.613142	0.845153
Slc12a9	0.513525	1
Slc13a4	0.675044	0.942425
Slc13a5	0.01367	0.124576
Slc15a2	0.068509	0.037199
Slc15a4	0.18166	0.104669
Slc16a1	0.376453	0.706926
Slc16a11	0.972076	0.347775
Slc16a12	0.768328	1
Slc16a13	1	0.86251
Slc16a14	0.0084	0.004041
Slc16a2	0.531983	0.073307
Slc16a4	0.809404	0.541772
Slc16a6	0.67753	0.567203
Slc19a1	0.531018	0.684537
Slc19a2	0.961992	0.080869
Slc19a3	0.00039	4.1e-09
Slc1a1	0.177385	0.006124
Slc1a4	1	0.523552
Slc20a1	0.157171	0.008001
Slc20a2	0.656536	0.03288
Slc22a12	0.258449	0.300926
Slc22a15	0.791059	0.536335
Slc22a17	0.269419	0.135256
Slc22a2	1	0.953648
Slc22a5	0.445595	0.138052
Slc22a8	0.840066	0.048594
Slc23a2	0.542304	0.285844
Slc25a1	0.005624	0.002113
Slc25a10	0.752753	0.645562
Slc25a11	0.294431	0.162907
Slc25a14	0.988664	1
Slc25a15	0.409763	1
Slc25a16	0.613363	0.077943
Slc25a17	0.837693	1
Slc25a19	0.504393	0.203301
Slc25a2	1	0.640656
Slc25a20	0.491661	0.845449
Slc25a22	0.721996	0.883952
Slc25a24	0.296422	0.71647
Slc25a25	0.764707	0.365838
Slc25a26	0.431949	0.852038
Slc25a27	0.521612	0.35653
Slc25a28	0.603377	0.687744
Slc25a29	1	0.425579
Slc25a3	0.936478	0.886564
Slc25a30	0.389607	0.003647
Slc25a32	0.901591	0.312202
Slc25a33	0.165608	0.713052
Slc25a35	0.604121	0.62112
Slc25a37	0.954714	0.409572
Slc25a38	0.410023	0.987401
Slc25a39	0.466604	0.018583
Slc25a4	0.689035	0.225231
Slc25a40	0.935453	0.786891
Slc25a42	0.730068	0.993439
Slc25a44	0.52079	0.109311
Slc25a46	0.692239	0.861783
Slc25a5	0.485271	0.44069
Slc26a2	0.891393	0.43782
Slc26a6	0.311044	0.169121
Slc27a1	1	0.805568
Slc27a4	1	0.256724
Slc29a1	0.348005	0.836376
Slc29a3	0.631657	0.655338
Slc29a4	0.337	0.041231
Slc2a1	1.46e-25	2.99e-07
Slc2a10	0.31269	0.039392
Slc2a12	1	0.054179
Slc2a13	0.901768	0.096124
Slc2a3	6.98e-05	0.037324
Slc2a8	0.541133	0.543474
Slc30a1	0.246769	0.743191
Slc30a3	0.010102	0.620938
Slc30a4	0.365268	0.78346
Slc30a5	0.872575	0.901782
Slc30a6	0.92222	0.301717
Slc30a7	0.04496	0.037743
Slc30a9	0.632715	0.710912
Slc31a1	0.883229	0.726669
Slc31a2	0.774952	1
Slc35a1	0.262358	0.203269
Slc35a2	0.745488	0.077841
Slc35a3	0.779998	0.495184
Slc35a4	0.119866	0.74846
Slc35a5	0.891604	0.078037
Slc35b1	1	0.191264
Slc35b2	0.201714	0.022958
Slc35d2	0.112851	0.068708
Slc35e1	0.291809	0.278388
Slc35e3	0.338398	0.418257
Slc35e4	0.243264	0.116543
Slc35f2	0.097544	0.098668
Slc35f5	0.073351	0.919066
Slc36a1	0.400544	0.022708
Slc37a4	0.855104	0.492961
Slc38a1	0.867314	0.141595
Slc38a2	0.352269	0.02584
Slc38a3	0.292486	0.075328
Slc38a5	0.138191	0.025269
Slc39a1	0.094027	0.004059
Slc39a10	0.86362	0.237741
Slc39a11	0.367803	0.656257
Slc39a13	0.680358	0.322363
Slc39a14	0.138596	0.203235
Slc39a6	0.748308	0.697802
Slc39a7	0.777869	0.419576
Slc39a8	0.264328	0.453537
Slc3a2	5.73e-12	3.76e-06
Slc40a1	3.37e-08	7.89e-06
Slc41a1	1	0.231974
Slc41a2	0.942989	0.019123
Slc44a1	0.859105	0.142248
Slc44a2	0.796369	0.959884
Slc45a1	0.614233	0.702096
Slc46a3	0.684051	0.159768
Slc4a11	0.025085	7.89e-06
Slc4a2	0.205724	0.732627
Slc4a4	0.959006	0.507825
Slc4a7	0.121778	0.021662
Slc5a6	1	0.364793
Slc6a17	0.165608	0.000512
Slc6a6	0.881411	0.525552
Slc6a8	0.027154	0.011199
Slc6a9	0.397419	0.234869
Slc7a1	0.004874	0.159482
Slc7a3	1	0.711115
Slc7a4	0.285347	0.103558
Slc7a5	0.156099	0.114913
Slc7a6	0.698298	0.684118
Slc7a8	0.004622	0.000441
Slc9a1	0.979044	0.2317
Slc9a2	0.385399	0.323444
Slc9a3	1	0.812384
Slc9a5	0.002609	0.003846
Slco1c1	9.43e-14	7.22e-05
Slco2a1	2.26e-05	1.25e-05
Slco2b1	0.145858	0.513836
Slco3a1	0.088166	0.04003

## Sheet: Figure 4 - figure supplement 1d
	I	C
	p value	p value
Abca2	0.241743	0.011427
Abca7	0.34069	0.277913
Abca8a	0.112241	0.011693
Abcb1a	0.37765	0.18122
Abcb6	0.756047	0.666558
Abcb8	1	0.974374
Abcc1	0.531791	0.084331
Abcc3	0.229347	0.846076
Abcc4	0.436831	0.246008
Abcc5	0.08406	0.026451
Abcc6	0.382723	0.006628
Abcc8	0.704098	0.017681
Abcc9	0.563297	0.189574
Abcd1	0.071377	0.030916
Abcd2	0.347854	0.976788
Abcd3	0.969105	0.910922
Abcd4	0.979374	0.713671
Abce1	0.805971	0.103687
Abcf1	0.794521	0.100197
Abcg1	0.867169	0.392586
Abcg2	0.605906	0.340262
Abcg4	0.298504	0.026272

## Sheet: Figure 4 - figure supplement 1e
	EC		AC		OL		PC		SMC		MG		FB
	C	I	C	I	C	I	C	I	C	I	C	I	C	I
Slc26a10	0.537225	0.383967
Slc38a5	0.0252685	0.138191
Slc52a3	0.445001	0.481319
Slc16a1	0.706926	0.376453
Slc1a1	0.00612379	0.177385
Slc16a2	0.0733071	0.531983
Slc30a1	0.743191	0.246769
Slc16a4	0.541772	0.809404
Slc39a8	0.453537	0.264328
Slc7a1	0.159482	0.00487385
Slc6a6	0.525552	0.881411
Slc2a1	2.99e-07	1.46e-25
Slco1c1	7.22e-05	9.43e-14
Slco2b1	0.513836	0.145858
Slc39a10	0.237741	0.86362
Slc40a1	7.89e-06	3.37e-08
Slc7a5	0.114913	0.156099
Slc19a3	4.1e-09	0.000390137
Itpr3	0.913393	0.956342
Tfrc	0.810088	0.237691
Mfsd2a	2.34e-16	5.12066e-11
Ceacam1	1	0.635636
Atp10a	0.00400922	0.0188702
Aqp11	0.621119	0.664767
Atox1	0.284752	0.698351
Abcc4	0.246008	0.436831
Abcg2	0.340262	0.605906
Ramp2	0.658598	0.754884
Abcb1a	0.18122	0.37765
Clic5	0.0311836	0.576517
Slc1a4			0.523552	1
Slc13a3			0.666558	0.0115394
Slc13a5			0.124576	0.01367
Slc22a4			1	1
Slc27a1			0.805568	1
Slc7a11			0.49076	0.00263799
Slc14a1			0.701202	0.296247
Slc1a3			0.255004	0.970857
Slc25a18			0.361937	0.912918
Slc4a4			0.507825	0.959006
Slc41a1			0.231974	1
Slc39a1			0.00405887	0.0940271
Slc6a11			0.876062	1
Slc7a10			0.346744	0.0296544
Slc41a1			0.231974	1
Slc20a1			0.00800091	0.157171
Slc1a2			0.160506	1
Atp2b2			0.0324467	0.728067
Atp13a4			0.460374	0.70033
Kcnc4			0.926724	0.777247
Kcnd2			0.940333	0.16859
Hrh1			0.127843	0.0179163
Kcnip3			0.0319619	0.0307776
Kcnj16			6.42e-07	0.026661
Kcnt1			0.0565149	0.436295
Fabp7			2.84e-05	0.0274711
Ramp1			0.167034	0.0880554
Kcnn2			0.000427326	0.0846004
Kcnk1			1.91e-05	8.55e-05
Grin2c			0.0987451	0.0299746
Gabrg1			0.309785	0.598291
Gabrb1			0.292661	0.808342
Grin2b			0.905739	0.840938
Gria2			0.256435	0.991653
Sfxn5			0.434433	0.935232
Trpm3			0.522337	0.950548
Gpm6a			0.515813	0.807018
Aqp4			0.895063	0.192257
Mlc1			0.405482	0.611338
Ttyh3			0.0198712	0.264746
Abcd2			0.976788	0.347854
Sv2a					0.946038	1
Cpox					0.928012	0.200964
Nipal4					2.14e-09	2.77e-05
Vldlr					0.0859016	0.881334
Abca2					0.0114268	0.241743
Kcnk13					0.721854	0.658341
Kcna6					0.706433	0.442819
Ptgds					0.703717	0.22928
Pex5l					0.0122889	0.116405
Gjc2					0.0314643	0.22022
Gjb1					0.0407919	0.0505553
Slc24a2					0.10869	0.555918
Kcna1					0.492067	0.863401
Slc44a1					0.142248	0.859105
Slc22a23					0.357052	0.541382
Nipa1					0.0850089	0.987557
Slc48a1					0.606213	0.980278
Npc1					0.0171466	0.214738
Gria4					0.0893307	1
Slc16a12							1	0.768328
Slc19a1							0.684537	0.531018
Slc6a13							0.258096	0.00165179
Slc7a2							0.606257	1
Slc5a5							0.906232	1
Slc1a5							0.649512	0.789275
Trpc3							0.253902	0.963763
Atp2a3							0.480364	0.428265
Abcc9							0.189574	0.563297
Kcnj8							0.456276	0.724825
Cox4i2							0.273348	0.428852
Ndufa4l2							0.411462	0.0429815
Atp13a5							0.321925	0.183523
Ano1							1	0.936475
Pkd1							0.034012	0.332013
Gjc1							0.378003	1
Kcnmb1							1	1
Cacna1c							0.193443	0.597632
Trpv2							0.597299	0.855344
Itpr1							0.0996799	0.932812
Kcne4							0.817447	1
Slc16a7									0.106166	0.961992
Slc16a11									0.347775	0.972076
Slc4a3									0.713052	0.838194
Slc2a4									1	0.717702
Slc8a1									0.0362939	0.432398
Tmem38b									0.719619	0.421145
Ryr2									0.0125015	0.157786
Kcnab1									0.803525	0.385909
Jph2									0.553809	1
Atp1b1									0.681514	0.87685
Scn4b									0.604974	0.299686
Kcnb1									0.000513187	0.169459
Kcnk3									0.0416518	0.282547
Fxyd1									0.579568	0.773599
Atp2b4									0.00752883	0.0278708
Kcna5									0.656605	0.692561
Abcc3											0.846076	0.229347
Slc2a5											0.0369452	0.0183261
Slc7a8											0.00044051	0.0046218
Ptk2b											0.0700169	0.0440088
Cybb											1	0.712095
Folr2											1	0.383967
Slc22a6													0.0222127	0.65765
Slc13a4													0.942425	0.675044
Gjb2													0.000581549	2.00076e-05
S100a6													0.376222	0.763789
Rbp4													0.838881	1
Rbp1													0.0796625	0.663841
Tmem37													0.725435	1
Scn7a													0.392768	1
Abca8a													0.0116928	0.112241
Cygb													0.90894	0.196193

## Sheet: Figure 4 - figure supplement 1f
	Glutamate transporters																																				Glucose transporters
ipsi	0.177385	1	0.970857	1	0.789275	0.57881	1	0.994463	0.046397	0.061898	0.114267	0.580898																									1.46e-25	0.31269	1	0.901768	6.98e-05	0.717702	0.018326	0.858894	0.541133	0.496077	0.950798	1	1
contra	0.006124	0.160506	0.255004	0.523552	0.649512	1	0.302097	0.424716	0.104714	0.037099	0.495475	0.828999																									2.99e-07	0.039392	0.054179	0.096124	0.037324	1	0.036945	0.124053	0.543474	0.148209	0.732464	0.906232	0.364793
[truncated: 98 more columns]
