# Supplementary material for: Cortical plasticity is associated with blood–brain barrier modulation
Source: eLife. 2024 Jul 18;12:RP89611. doi: 10.7554/eLife.89611 (PMC11257677; doi:10.7554/eLife.89611)
Supplement: Figure 4—source data 1. [file elife-89611-fig4-data1.xlsx]

## Sheet: Figure 4b
	log(p)-
cell junction organization	15.2081
regulation of nervous system development	12.6039
modulation of chemical synaptic transmission	11.8108
gliogenesis	9.45635
localization within membrane	9.19998
vasculature development	8.80444
synaptic vesicle cycle	8.7785
regulation of glial cell differentiation	8.5523
postsynapse organization	8.28179
cognition	7.45395
camera-type eye development	7.41078
forebrain development	7.06954
regulation of kinase activity	6.83655
regulation of ion transport	6.7428
positive regulation of cell death	6.68716
actin cytoskeleton organization	6.68215
postsynaptic density organization	6.38068
dendrite development	6.3

## Sheet: Figure 4c
	Per	aSMC	vSMC
Abcc9	0.1896
Agap2	0.427
Ano4	0.3524
Apod	0.9721
Apoe	0.2189
Arhgap31	0.02797
Coro1b	0.2688
Ece1	0.009033
Emcn	0.004508
Flt1	0.1677
Fam118b	0.5023
Fbln1	1
Ggt1	1
Gpr4	0.973
Ifi30	0.2838
Igf2	0.4248
Itm2a	0.002576
Jup	0.6647
Kcnj8	0.4563
Lgals9	0.108
Nodal	0.7471
Nrxn2	0.7355
Nxph4	0.006077
Pcdhgc3	0.2186
Pde2a	0.3024
Pde8a	0.05832
Phc1	0.733
Phldb1	0.1709
Plod1	1
Por	0.8458
Ppp1cc	0.1644
Prex2	0.3566
Sepp1	0.3427
Sfrp2	0.6954
Slc22a8	0.04859
Slc6a13	0.2581
Spp1	0.3538
St8sia4	0.9472
Tnfrsf19	0.08381
Trpc3	0.2539
Ttll3	0.7256
Uchl1	0.2188
Adamts1		0.003452
Arl4d		0.05795
Atf3		2.71e-05
Atf4		0.8514
Atp10a		0.004009
Bambi		0.4844
Btg2		0.00337
Cebpb		1.58e-05
Ckb		0.3476
Cnn1		1
Csrnp1		0.02028
Csrp1		0.7929
Cyr61		1.02e-08
Ddit4		8.16e-12
Dnajb1		0.08591
Dstn		0.3951
Dusp1		2.86e-08
Efhd1		0.791
Egr1		0.007191
Eln		0.9357
Errfi1		7.41e-15
Fhl1		0.6536
Fos		5.86e-14
Fosb		4.17e-28
Fosl2		7.87e-23
Gadd45g		1.36e-10
Gadd45b		5.88e-05
Hes1		0.7466
Hlx		0.0376
Hspa1a		1
Hspa1b		1
Hspa8		0.7405
Hspb1		0.05742
Id2		0.7814
Id3		0.0002089
Ier2		0.0229
Ier3		0.1762
Igfbp4		0.1537
Irf1		0.2489
Jun		0.0127
Junb		0.1062
Jund		0.4182
Klf2		0.1501
Klf4		0.05199
Klf6		0.0005815
Lims2		0.8152
Lrrfip1		0.1234
Ndrg1		2.66e-10
Nfib		0.2719
Nfix		0.3157
Nfkbiz		0.003622
Nr4a1		0.01653
Ppp1cb		0.3733
Ppp1r15a		0.1482
Ptgis		0.003299
Rasd1		0.0004492
Rrad		0.4875
Sdc4		0.1546
Slc38a2		0.02584
Slmap		0.0554
Smtn		0.09306
Socs3		0.9163
Sorbs2		0.06621
Stom		0.202
Synm		0.8712
Thbs1		0.4233
Tinagl1		4.31e-11
Vim		0.5743
Wfdc1		0.02584
Zfp36		6.34e-06
Abca1			0.795
Car4			0.02914
Col6a2			0.7463
Slc5a5			0.9062

## Sheet: Figure 4d
synaptic plasticity			extracellular matrix			tgf beta			BBB integrity			tight junctions			BBB structure			cellular stress			inflammatorty
	c	i		c	i		c	i		c	i		c	i		c	i		c	i		c	i
APP	0.002113	0.0508732	ADAMTS1	0.003452	0.00943902	ACVR1	0.139066	0.529026	CDH5	0.772077	1	CGNL1	0.001804	5.05e-05	AKAP12	0.426993	0.753855	ADCY1	0.082276	0.427087	CCL17	1	0.497591
AVPR1A	1	0.161795	ANPEP	0.021956	0.169044	ACVR1B	0.026144	0.0671883	ICAM1	1	0.817876	CLDN1	0.122356	1	AMHR2	0.974298	1	CDKN1A	1.19e-26	2.14e-55	CCL19	0.343822	0.68613
BDNF	0.000103	7.69e-05	BCAN	0.421702	0.852844	ACVR1C	0.268127	0.784535	PECAM1	0.689915	0.826108	CLDN12	0.321118	0.00578715	CCM2	0.100874	0.058238	CDKN2A	0.009597	0.0729136	CCL24	0.032738	1
BGLAP	0.85401	0.940088	BGN	0.446246	0.152004	ACVR2A	0.373838	0.565501	TEK	0.999921	0.37595	CLDN3	0.348067	0.215041	CD163	0.217218	0.00337733	GPX3	0.845265	0.522693	CCL27	0.828604	0.870506
GABBR1	0.15258	0.680581	COL1A1	0.271837	0.756732	ACVR2B	0.006281	0.0422177	VCAM1	0.072415	0.0058137	CLDN5	0.253902	1	CD2AP	0.217218	0.594942	MAPK14	0.966555	0.560253	CCL5	0.200827	1
GABBR2	0.002689	0.030953	COL4A1	0.673853	0.439641	ACVRL1	0.040792	0.816211				CLDN10	0.013064	0.0641916	CD99	0.108048	0.795743	MTOR	0.161501	0.184561	CDC42EP4	0.114221	0.0391679
GABRA1	0.102095	0.968539	CRB1	0.658598	0.229422	ALB	0.000403	1.45e-08				ESAM	0.508289	0.341384	CDC42	0.678904	0.436691	NCF1	0.221163	0.0135916	CHI3L1	0.781995	0.512879
GABRA2	0.130057	0.607836	CSPG5	0.000161	1.55e-06	BMPR1A	0.472909	0.904957				F11R	0.014737	0.965755	CDH1	0.838056	0.407838	NCF2	0.256837	0.414478	CSF1	0.173482	0.323996
GABRA3	0.141077	0.468846	CTNNB1	0.001401	0.312984	BMPR1B	0.591975	0.585223				JAM3	0.153453	0.841431	CDH2	0.680582	0.749352	NFE2L2	1	0.991653	CX3CL1	0.002356	0.00781972
GABRA4	0.290568	0.544308	DAG1	0.278766	0.905549	BMPR2	0.130992	0.547826				MARVELD2	0.131826	0.781018	CLEC11A	0.72647	0.622845	OGG1	0.167496	0.132977	CXCL10	0.002202	1
GABRA5	0.473551	1	HAPLN1	0.457301	0.655844	SMAD2	0.437808	0.0422667				OCLN	0.0147	2.07e-05	DAGLB	0.058578	0.0967476	PPARGC1A	0.010723	0.381842	CXCL12	0.782313	0.978503
GABRB1	0.292661	0.808342	HAPLN2	0.028129	0.0285477	SMAD3	0.006048	0.120423				TJP1	0.543474	0.557328	DLG4	0.941735	0.670044	RGS5	0.85046	0.668369	CXCL16	0.544503	0.348005
GABRB2	0.078297	0.522089	ITGA1	0.280871	0.548065	SMAD4	0.258385	0.907099				TJP2	1	0.476164	EFNB2	0.59725	0.22288	SOD1	0.230031	0.91567	EBI3	0.573955	0.843887
GABRB3	0.098415	0.469241	ITGA6	0.369709	1	SNCG	0.624917	1				TJP3	1	0.509098	EHD2	0.112788	0.313979	SOD2	0.277965	0.510402	FKBP4	0.422435	1
GABRD	0.394968	1	ITGAM	0.036536	0.0649148	PXN	0.001997	0.0212467				TJAP1	0.000265	0.056682	FGF2	0.124837	0.325472	TP53	0.700458	0.766247	GRN	0.021966	1
GABRG1	0.309785	0.598291	ITGB1	0.942393	0.382397	TGFB1	0.006641	0.345014							GJA4	0.068946	0.0094398	TXN	0.104046	0.447404	HMGB1	0.9647	0.141977
GABRG2	0.33888	0.92482	ITGB5	0.007387	0.054949	TGFB2	0.107808	0.0809564							GJA5	1	0.4347	TXNRD1	0.124837	0.434853	IL11	1	0.572778
GABRG3	0.059465	0.61003	ITGB8	0.289537	0.656801	TGFB3	0.489673	0.654157							GJB6	3.04e-11	2.48e-14				IL12A	0.171164	0.25246
GABRQ	1	0.880875	LAMA1	0.300214	0.505761	TGFBR1	0.486788	0.0208211							GJC2	0.031464	0.22022				IL15	1	0.103772
GABRR2	0.390415	0.636622	LAMA4	0.817447	0.743562	TGFBR2	0.986826	0.852844							GJD2	0.706223	0.70241				IL16	0.440076	0.852049
GABRR3	1	0.353064	LAMA5	0.397608	0.127752	TGFBR3	0.084331	0.266974							HEBP1	0.694488	0.290874				IL18	0.515932	0.728527
GRIA1	0.219631	0.511491	LAMB2	0.536743	0.531632										HGF	0.053089	0.452635				IL1A	3.45e-05	0.000737115
GRIA2	0.256435	0.991653	LAMB3	0.189496	0.678667										HTRA1	0.302847	0.00397176				IL1RN	0.871221	1
GRIA3	0.153658	0.589522	LAMC1	0.528463	0.691468										INSR	0.071724	0.521224				IL23A	0.178433	0.991653
GRIA4	0.089331	1	LAMC2	0.655923	0.670044										KLF4	0.051995	0.000964309				IL33	1	0.253896
GRIK1	0.22254	0.155298	LAMC3	0.100407	0.549586										KRIT1	0.918849	1				IL34	0.042507	0.810136
GRIK2	0.543658	0.306115	MMP14	0.537328	0.485812										L1CAM	0.013414	0.114471				IL6R	0.000204	0.00229121
GRIK3	0.030534	0.441788	MMP15	0.036945	0.160699										LEPR	0.721854	0.911053				IL6ST	0.742733	0.589353
GRIK4	0.785267	0.825848	MMP16	0.01196	0.0502054										LYVE1	0.215876	0.127022				KITLG	0.630534	0.039102
GRIK5	0.084606	1	MMP17	0.000623	0.135912										MAP2	0.061468	0.137661				LRRK2	0.334133	0.818608
GRIN1	0.130602	0.016259	MMP2	0.171442	0.00232858										MAPT	0.182841	0.426437				MIF	0.196526	0.820547
GRIN2A	0.036294	0.398256	MMP9	0.289964	0.0561341										MGLL	0.090041	0.812284				NFKB1	0.183684	0.347854
GRIN2B	0.905739	0.840938	MYL9	0.567377	0.852838										MYLK	0.876062	0.478568				PPIA	0.210439	0.565176
GRIN2C	0.098745	0.0299746	NCAN	0.164358	0.843132										NGF	0.921927	0.445595				PTGES	0.246927	0.570961
GRIN2D	0.092058	0.284803	NID2	0.464192	0.822626										NR2F2	0.003824	1.89e-05				PTGS2	0.071995	0.287157
GRIN3A	0.238943	0.359453	STAT3	0.056667	0.0278557										NRP1	0.080279	0.325383				PTPRC	1	0.41561
GRIN3B	0.049181	0.57197	TIMP1	0.749609	0.169156										PACSIN2	0.027344	0.0878261				PTX3	1	0.653211
GRM8	0.040114	0.549535	TIMP2	0.024643	0.0396294										PANX1	0.139066	0.0116846				TBK1	1	0.976981
HCN2	0.196634	0.368726	TIMP4	0.432371	0.681027										PANX2	0.099394	0.575621				TLR4	0.426487	0.838194
KCNJ8	0.456276	0.724825	TIMP3	0.005941	0.000173881										PANX3	1	0.419814				TNFRSF1A	0.000447	0.44155
KCNQ2	0.026798	0.161574	TNC	0.672527	1										PARD3	0.605641	0.367069				TNFRSF1B	1	0.59085
KCNB1	0.000513	0.169459	TNR	0.047479	0.422081										PDAP1	0.433494	1				TNFSF10	0.090667	0.258581
KCNAB2	0.033514	0.215041	VCAN	0.221734	0.860805										PDCD10	0.969225	0.132428				TNFSF12	0.084331	0.614517
NRGN	0.376219	0.55713													PDGFB	0.059616	0.0297982				TNFSF13	0.117503	0.527127
SYN1	0.007104	0.100154													PLN	1	0.333721				TREM2	0.348802	0.7761
SYN2	0.004585	0.00196771													PTCH1	0.876169	0.610246
SYN3	0.022314	0.411821													SEMA3G	0.619996	0.953064
SYP	0.41934	0.408989													SERPINE1	0.007414	0.00487385
MPDZ	0.006965	0.0637182													SHH	0.733028	0.720026
MPP2	0.030791	0.155298													SMO	0.645485	0.397419
MAGI2	0.017846	0.242159													SPP1	0.353788	0.665915
MAGI3	0.047465	0.266727													SRC	0.176142	0.488364
SHANK1	0.089848	0.495488													STMN3	0.172133	0.46481
SHANK2	0.047178	0.310451													TAGLN	0.780112	0.774573
SHANK3	0.333691	0.5693													TF	0.485852	0.888212
HOMER1	0.002329	0.103241													VEGFA	0.393555	0.738083
DLGAP1	0.207686	0.663492													VEGFC	0.248849	0.427809
DLGAP2	0.009927	0.364642													VTN	0.106292	0.565501
DLGAP3	0.00868	0.510941
DLG1	0.002989	0.0247014
DLG2	0.08652	0.660803
DLG3	0.128409	0.45505
DLG4	0.941735	0.670044
PDZD2	0.012484	0.363618
CNIH2	0.029692	0.214424
CNIH3	1	0.554179
SHISA6	0.169121	0.22928
SHISA7	4.22e-06	0.0196628
SHISA8	0.249042	0.52044
DAGLA	0.001296	0.0504717
SH3GL2	0.007194	0.0512431
KALRN	0.004369	0.215035
CHRNA7	0.01386	0.0567344
CRTC1	0.0137	0.282942
PRKCG	0.000207	0.00252698
EPHB2	0.023918	0.248799
RASGRF2	0.007354	0.0904757
SNAP25	0.012985	0.27935
SLC1A1	0.006124	0.177385
MECP2	0.005345	1
NSG1	0.086157	0.00583752
NLGN1	0.093709	0.752929
NLGN3	0.074414	0.701478
SYNGAP1	0.042585	0.51903
RIMS1	0.115497	0.684051
RIMS2	0.032795	0.490497
RIMS3	0.031917	0.076001
CPG1	0.494151	0.759223
STX3	0.002113	0.233597
PAIP2	0.028185	0.0136191
EGR1	0.007191	0.00946156
EGR2	0.003127	0.0511635
NFATC4	0.018536	0.170362
CAMK2A	0.022093	0.347854
CAMK2B	0.015186	0.131164
IGSF11	0.019581	0.414478
BSN	0.004281	0.372339
FYN	0.030534	0.192947
